# Supplementary material
Source: PubMed Central journal article supplement (PMC2822122)

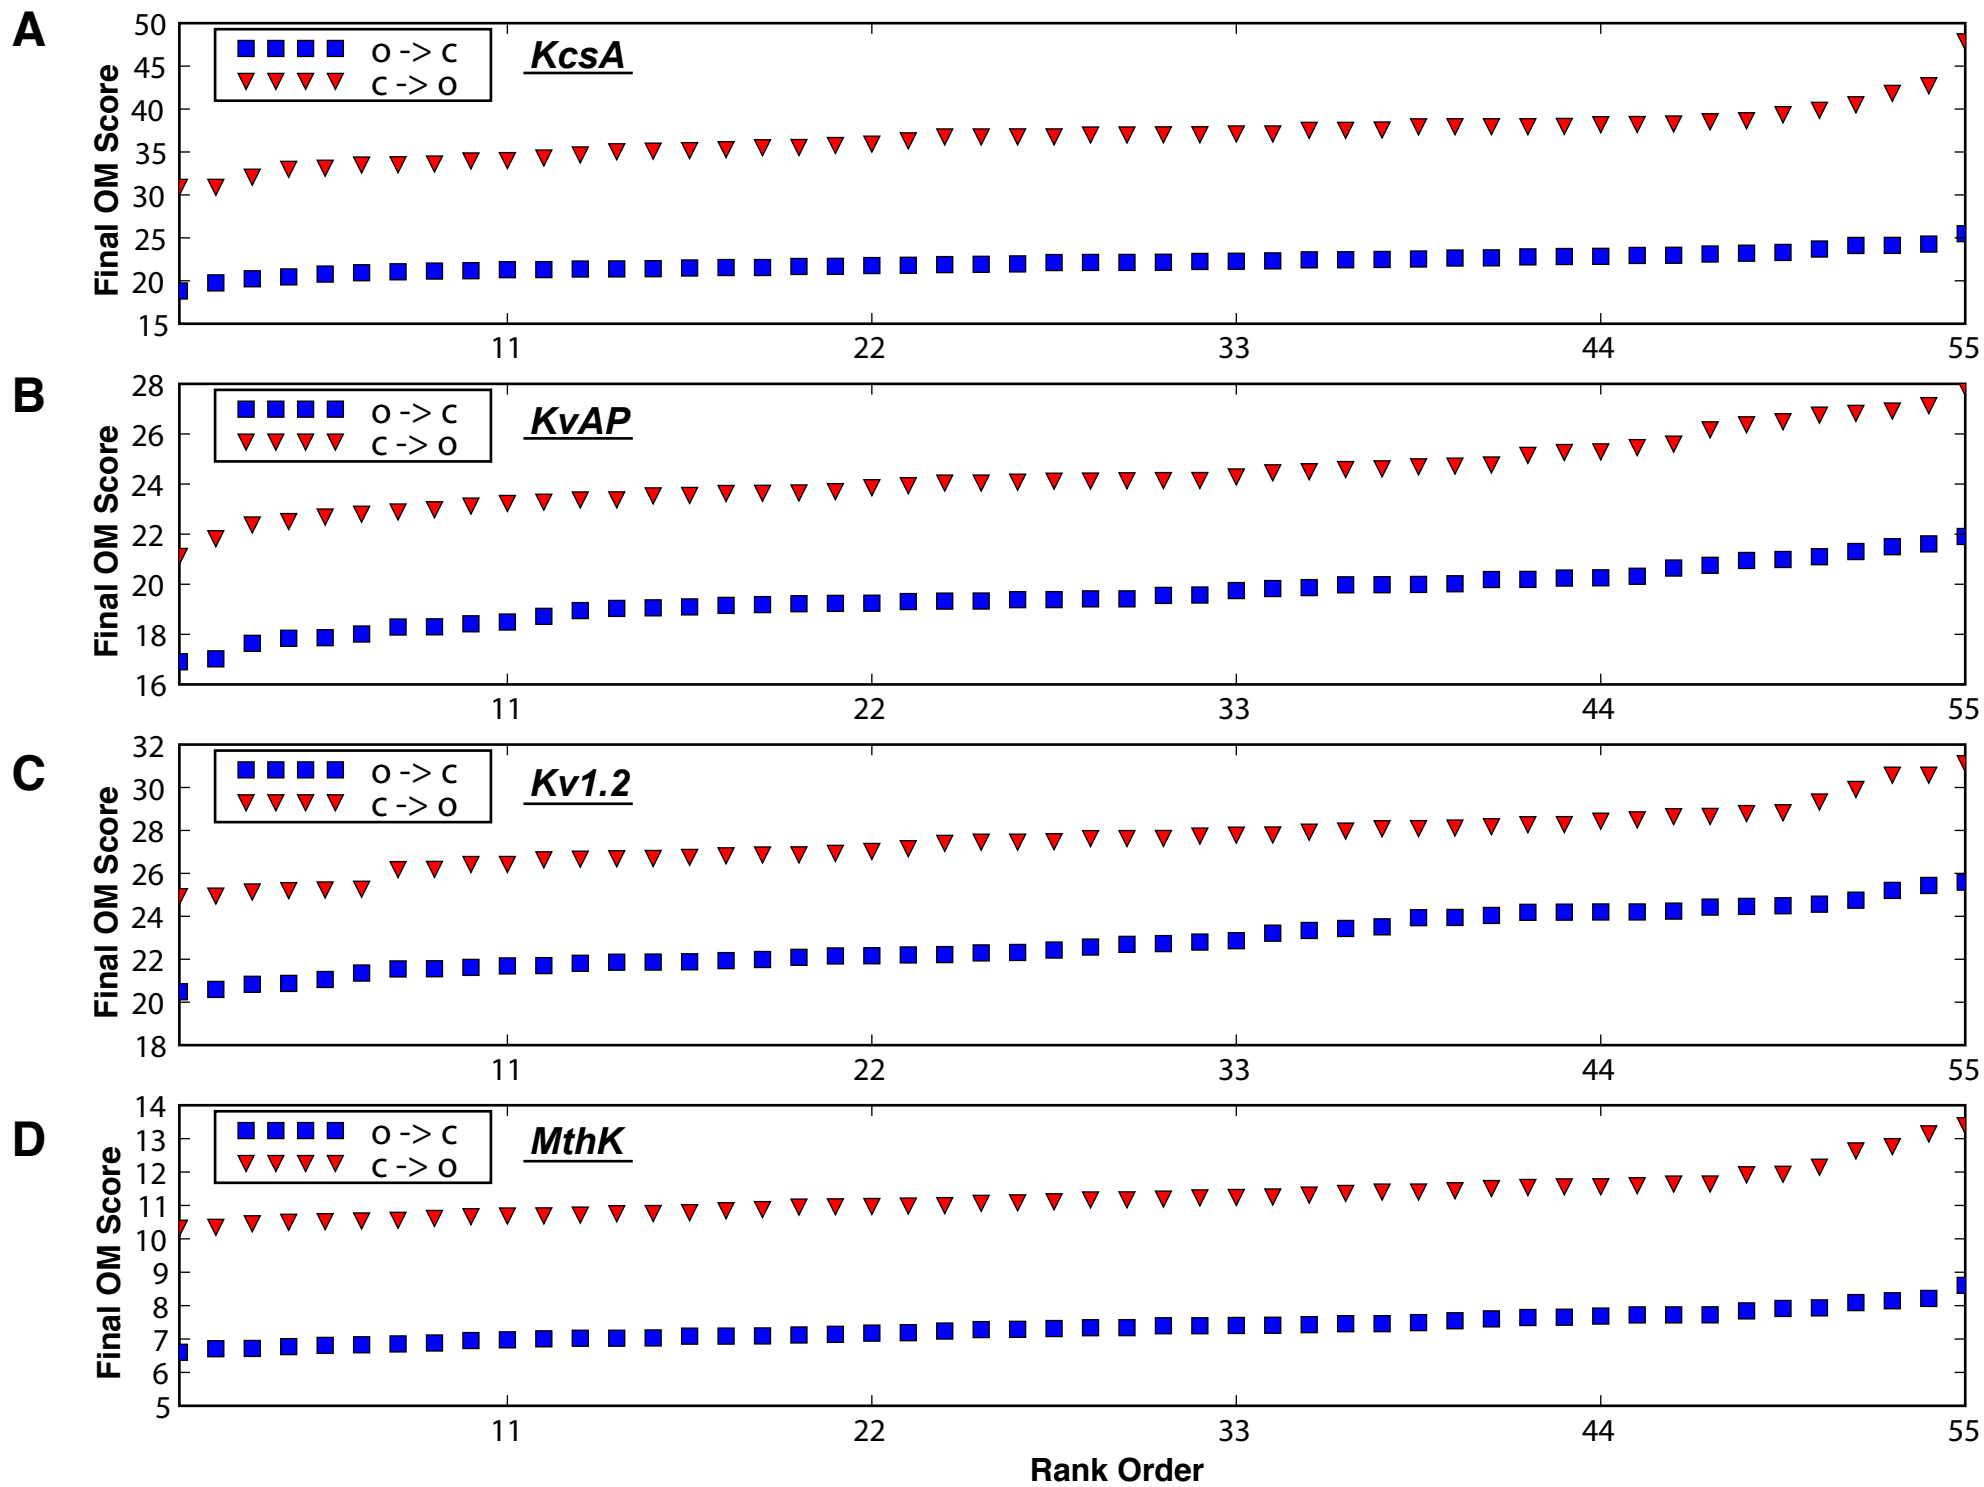

Supplement: NIHMS156019-supplement-Supp_Fig_s01.pdf [file NIHMS156019-supplement-Supp_Fig_s01.pdf]

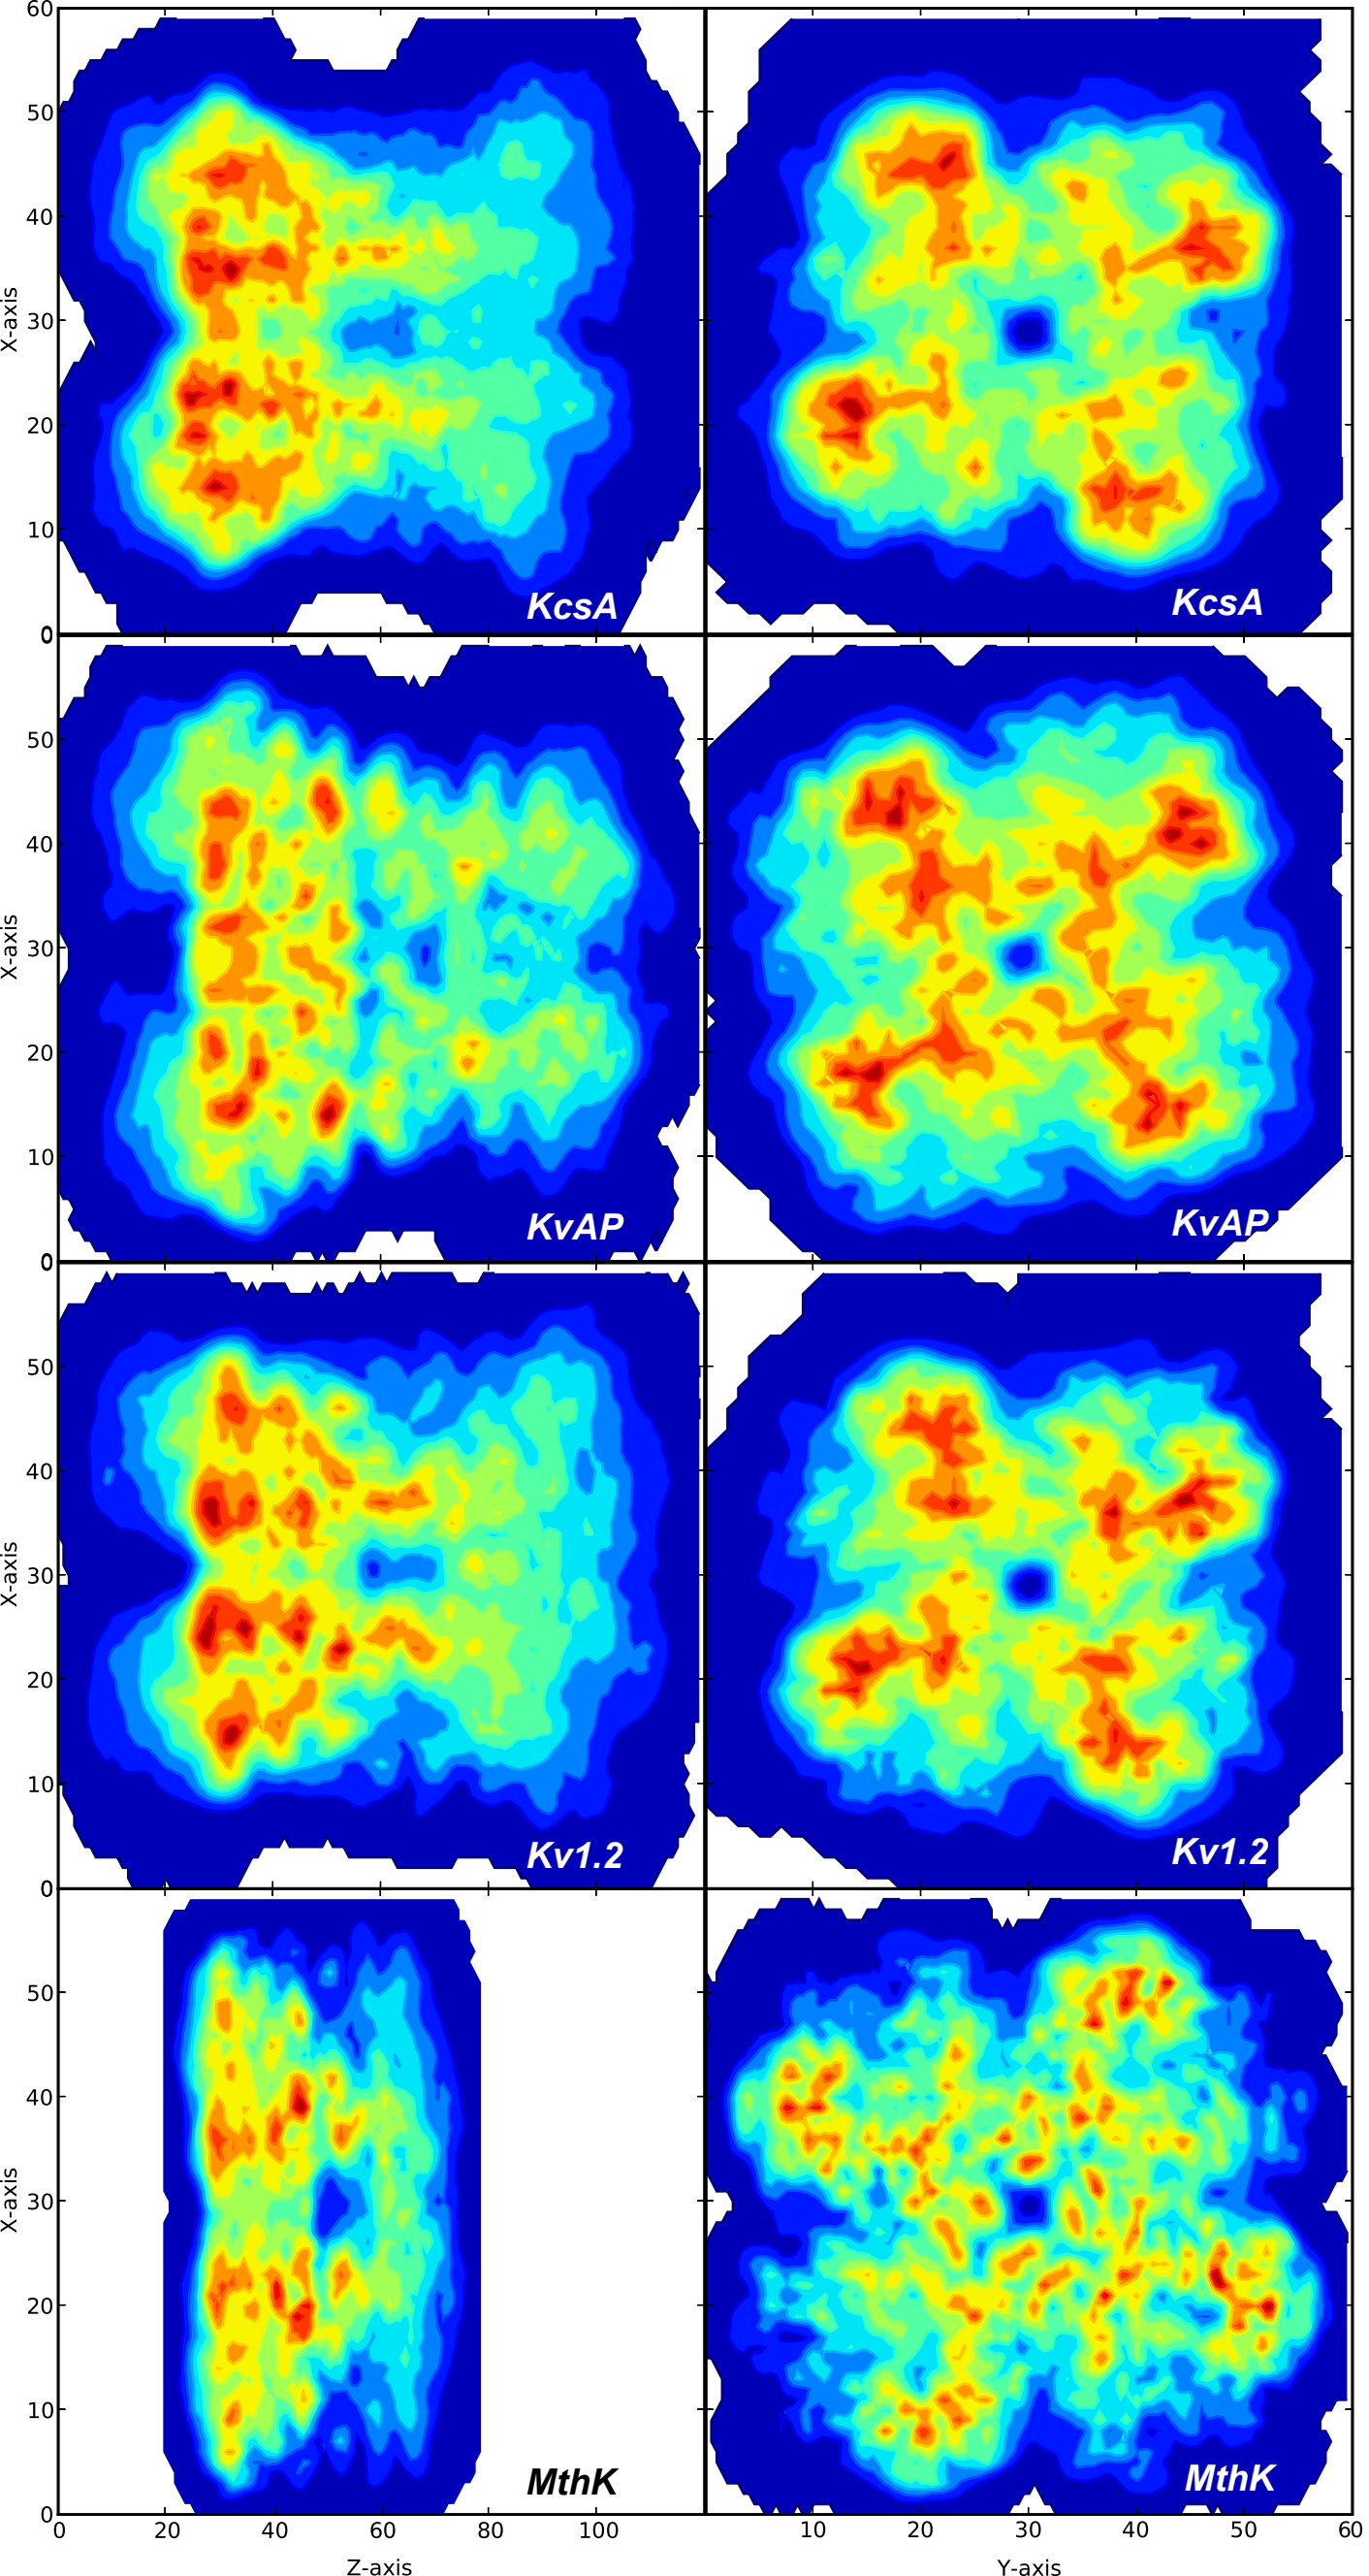

Supplement: NIHMS156019-supplement-Supp_Fig_s02.pdf [file NIHMS156019-supplement-Supp_Fig_s02.pdf]

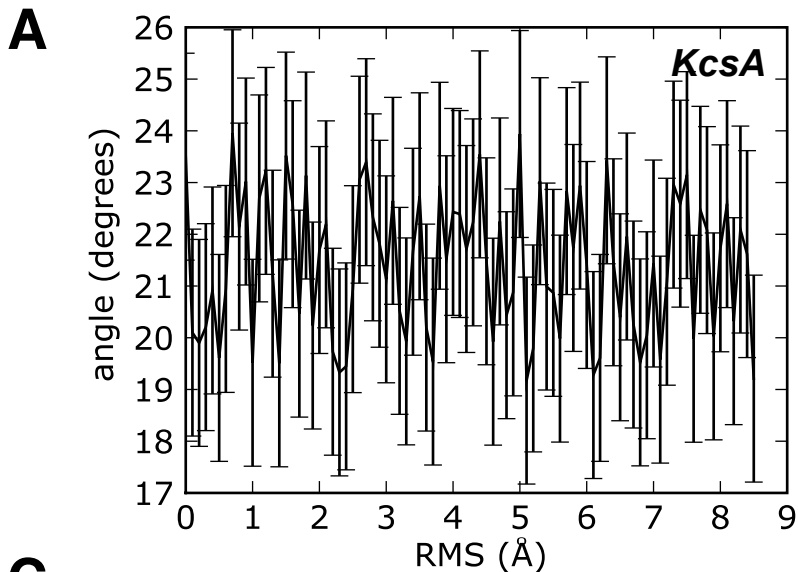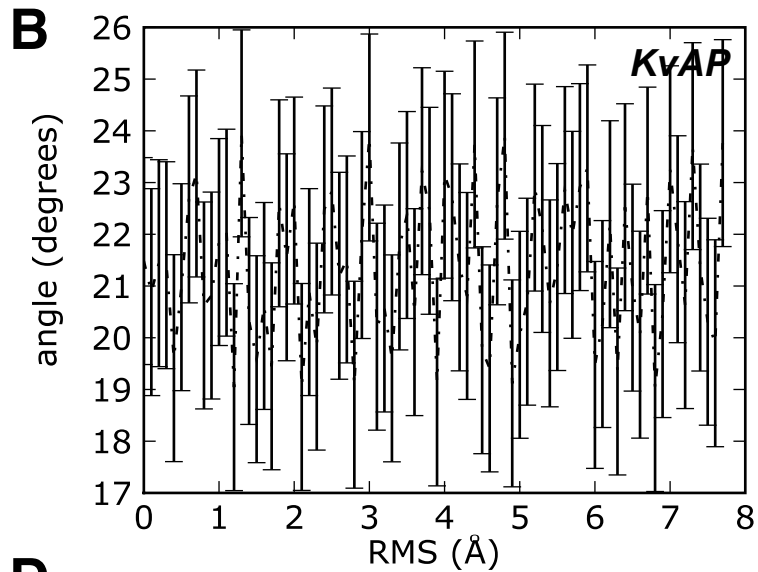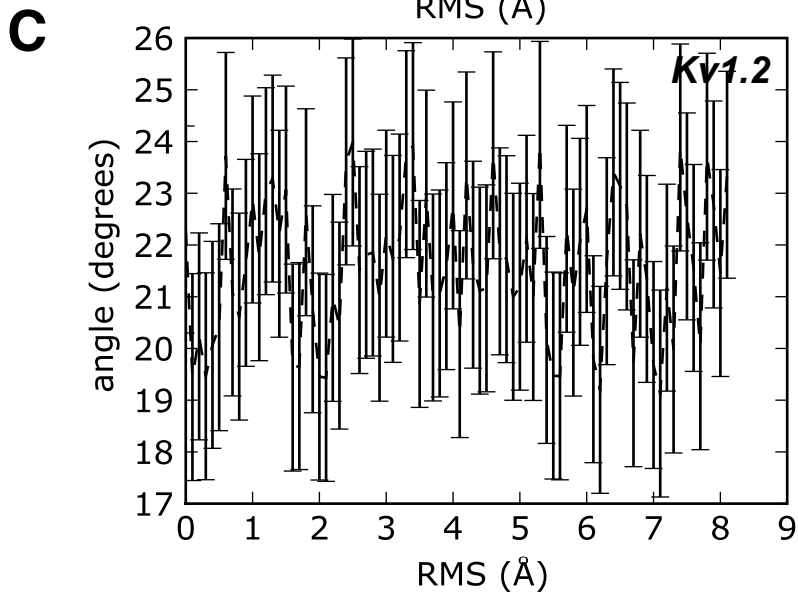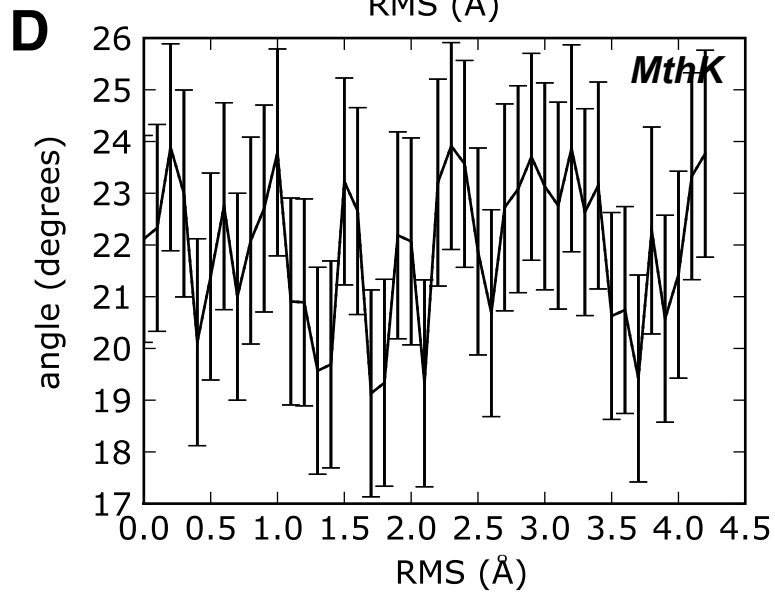

Supplement: NIHMS156019-supplement-Supp_Fig_s03.pdf [file NIHMS156019-supplement-Supp_Fig_s03.pdf]

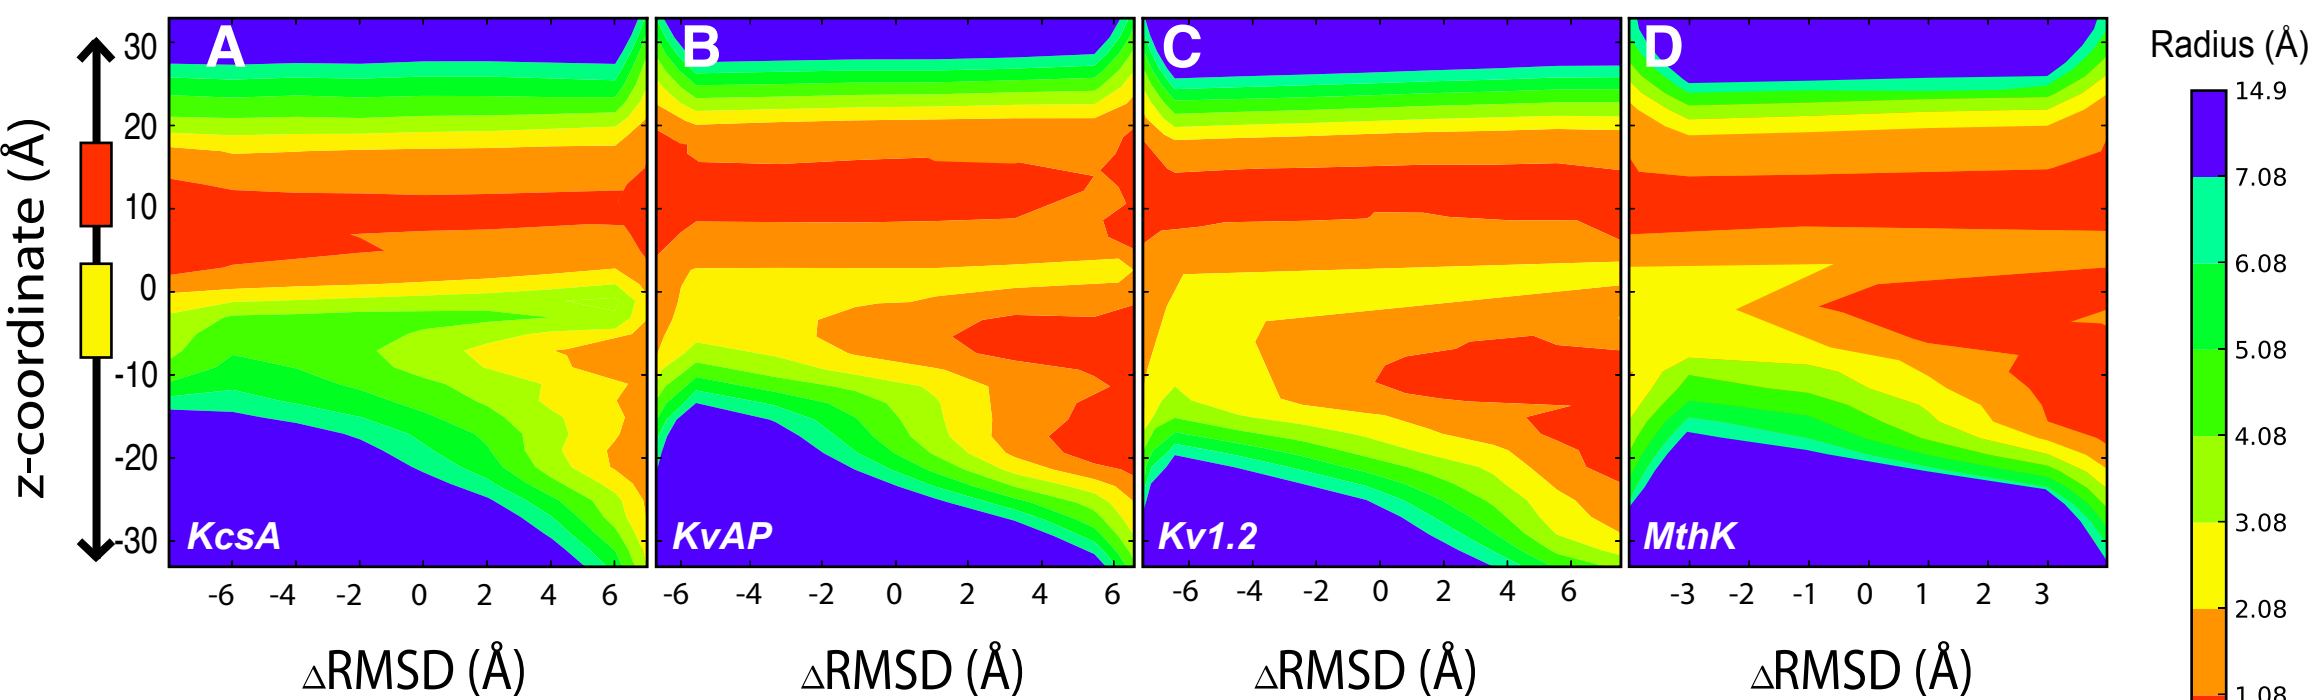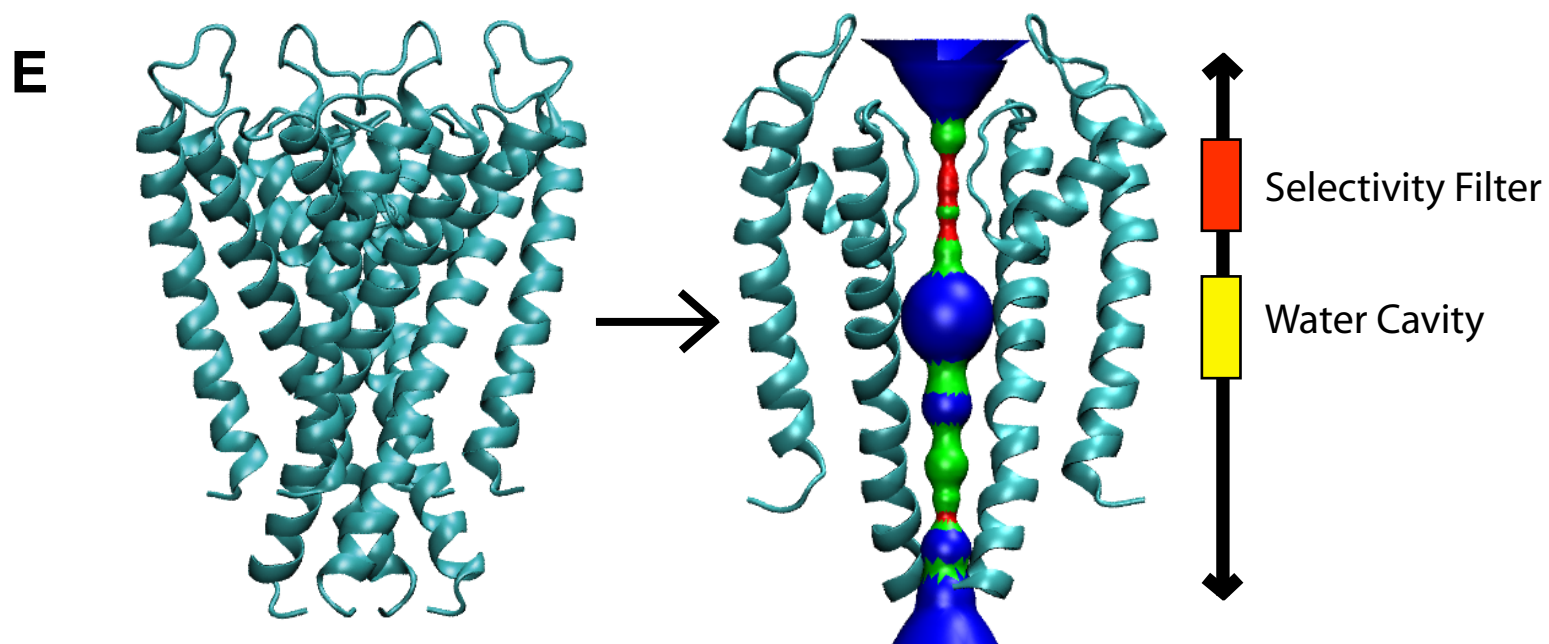

Supplement: NIHMS156019-supplement-Supp_Fig_s04.pdf [file NIHMS156019-supplement-Supp_Fig_s04.pdf]

Chi Angle (degrees)

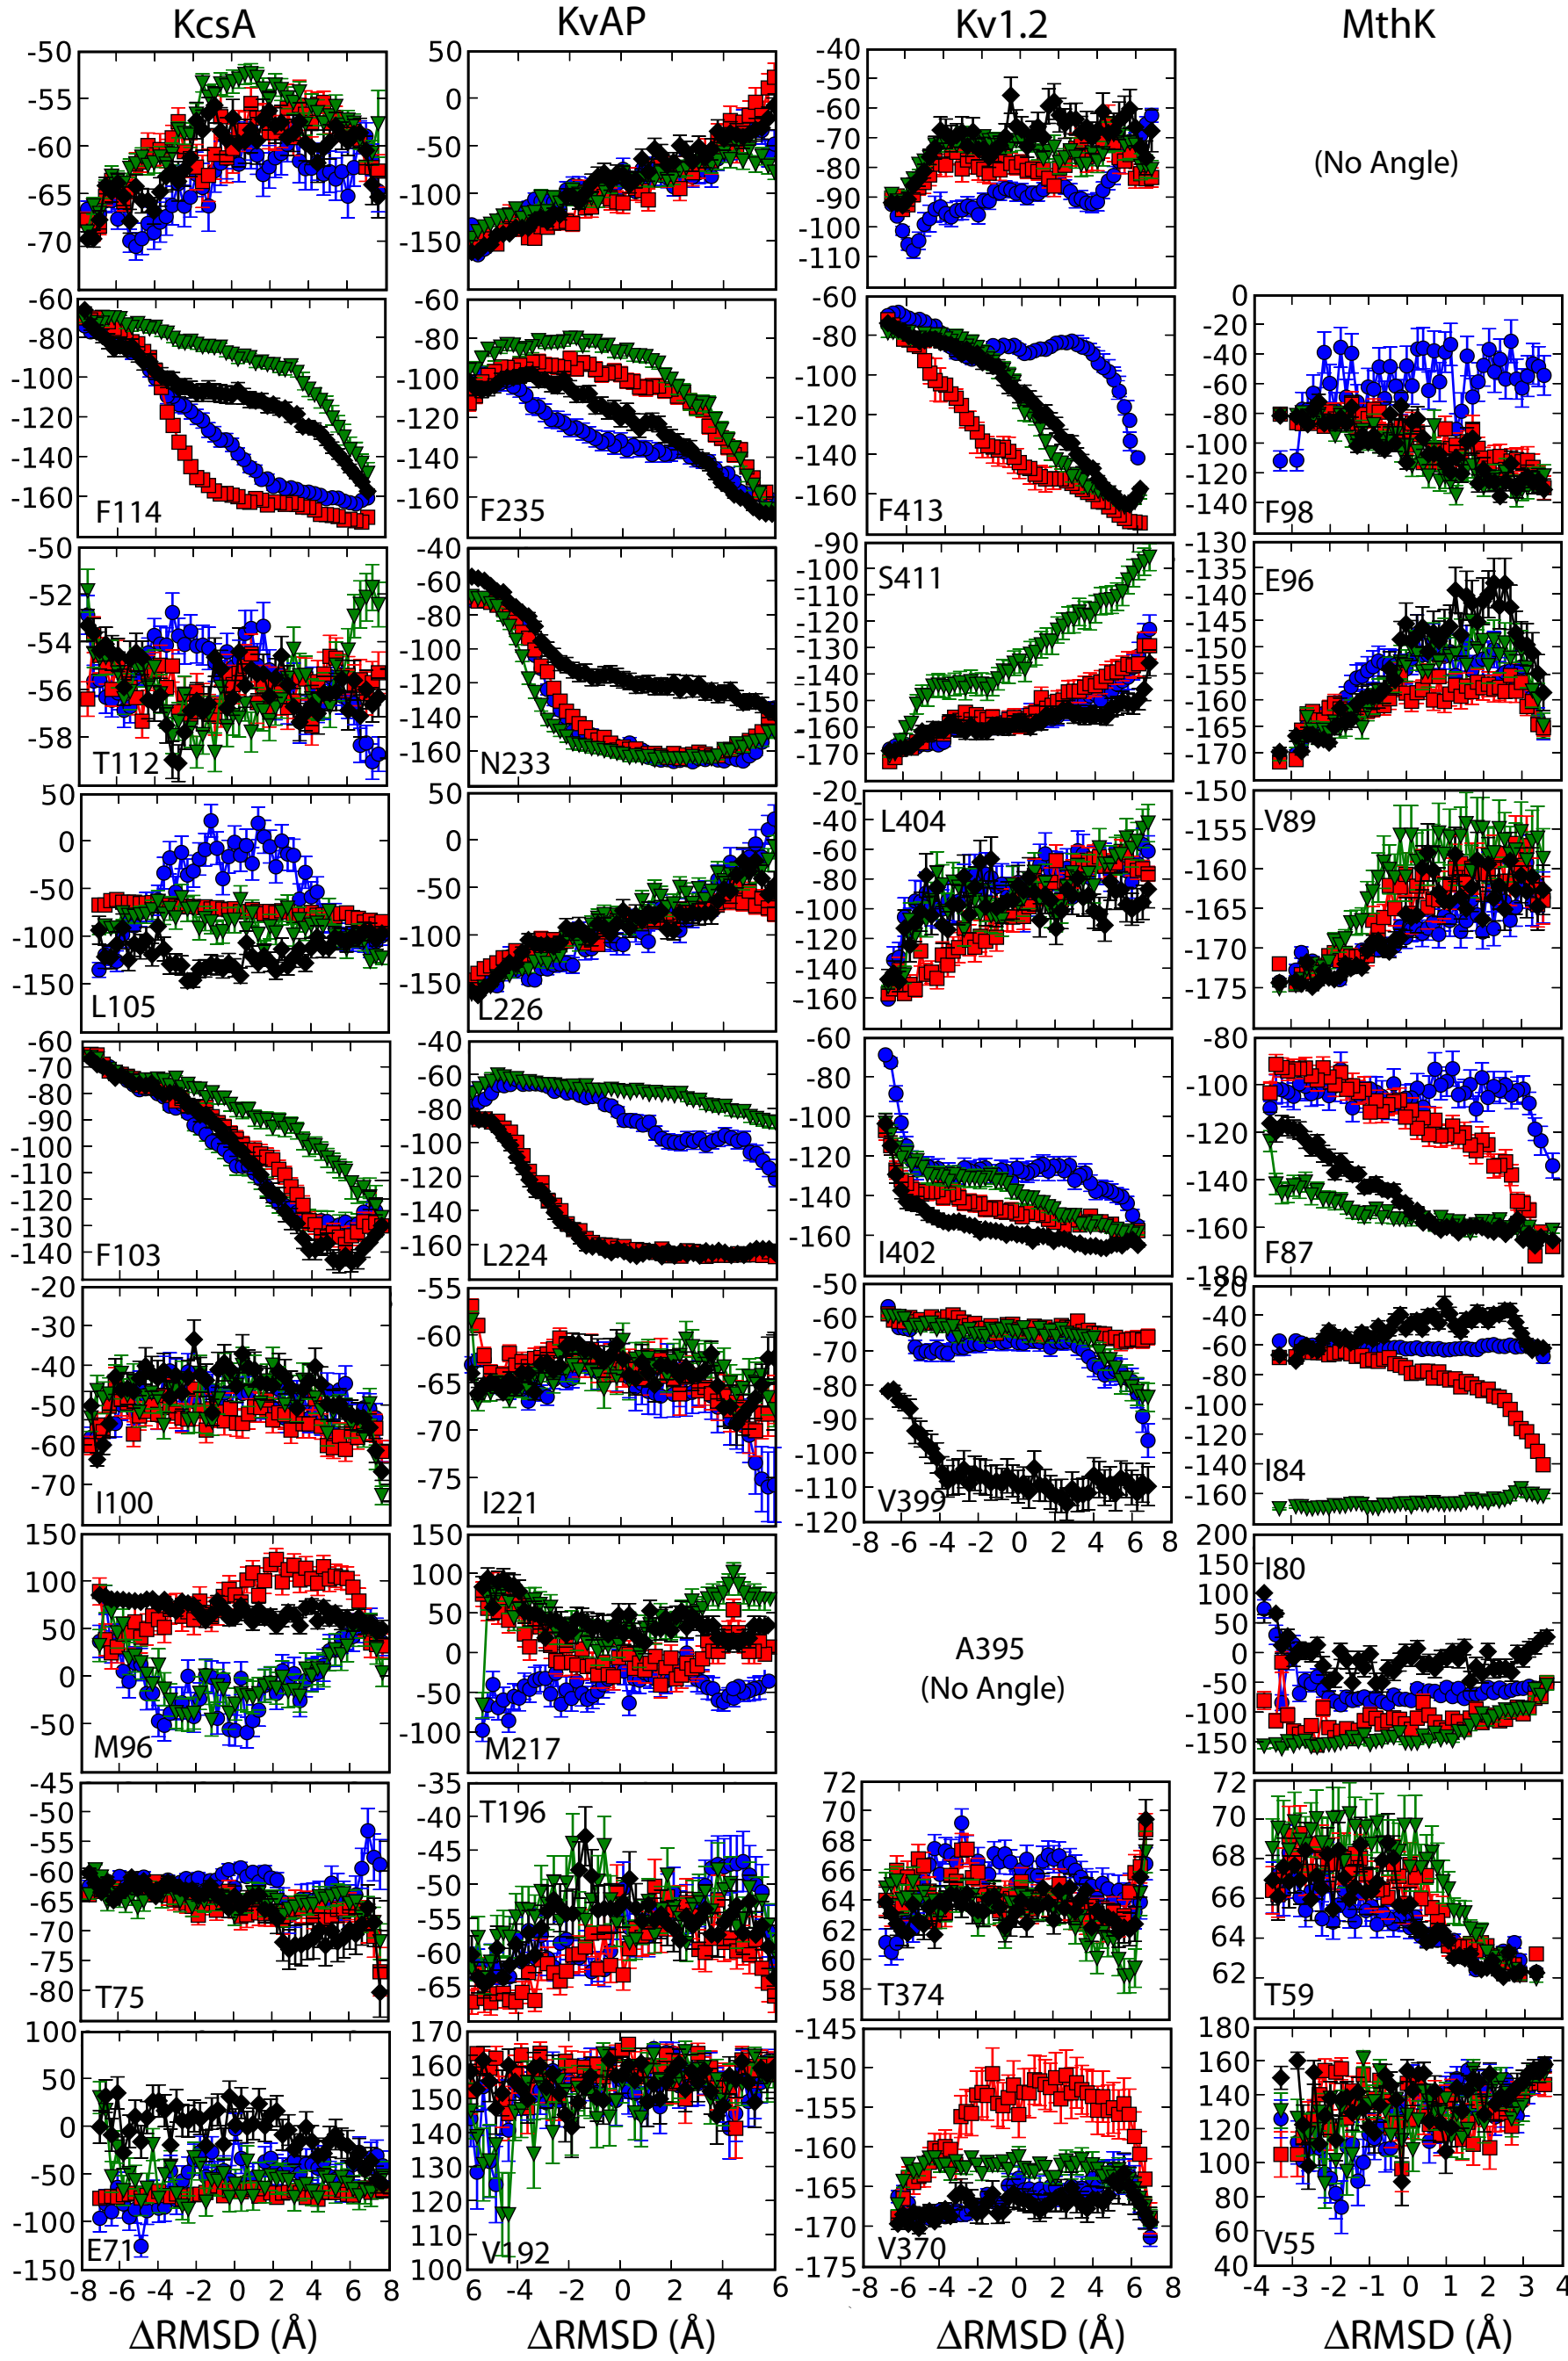

Supplement: NIHMS156019-supplement-Supp_Fig_s05.pdf [file NIHMS156019-supplement-Supp_Fig_s05.pdf]

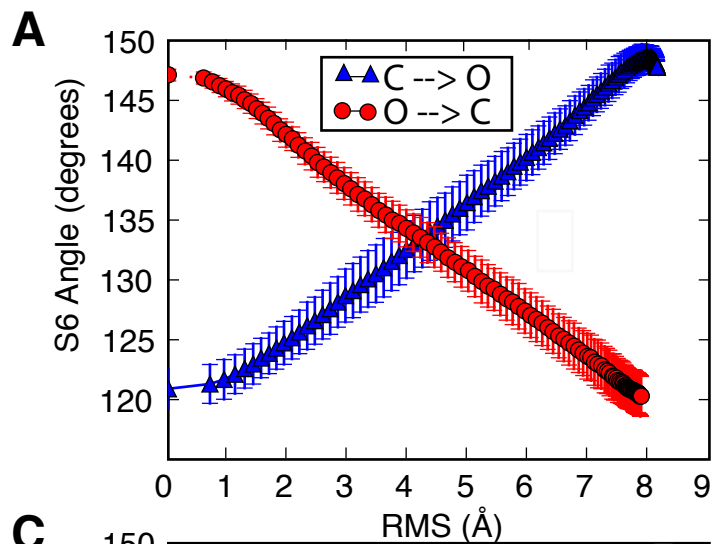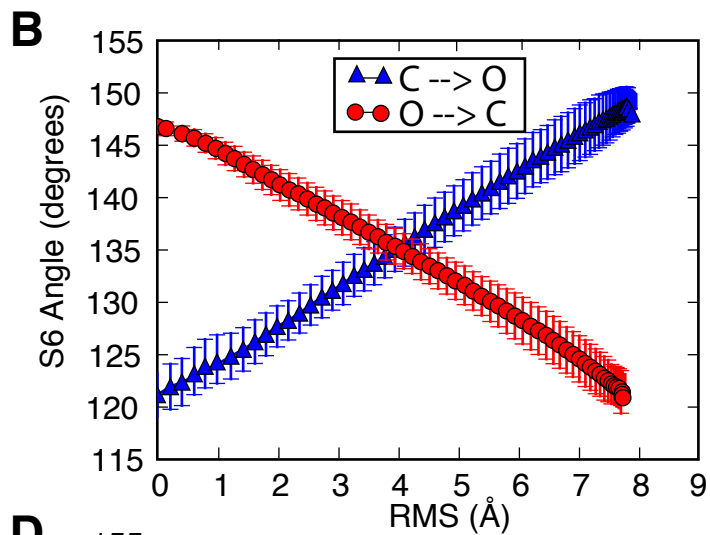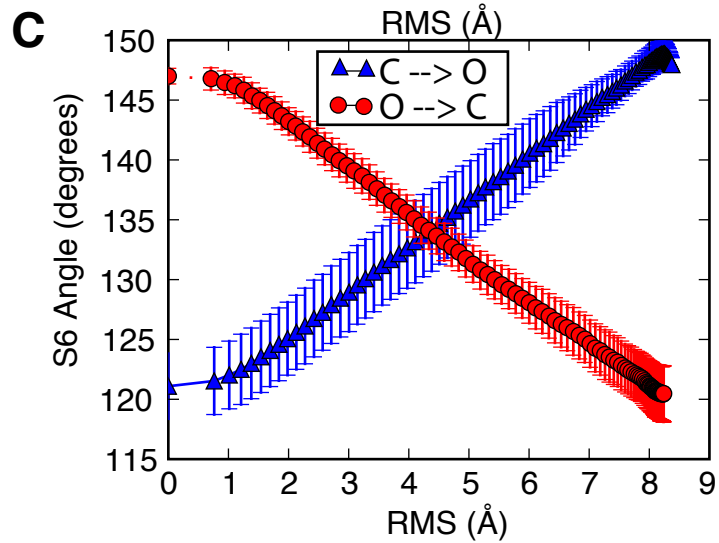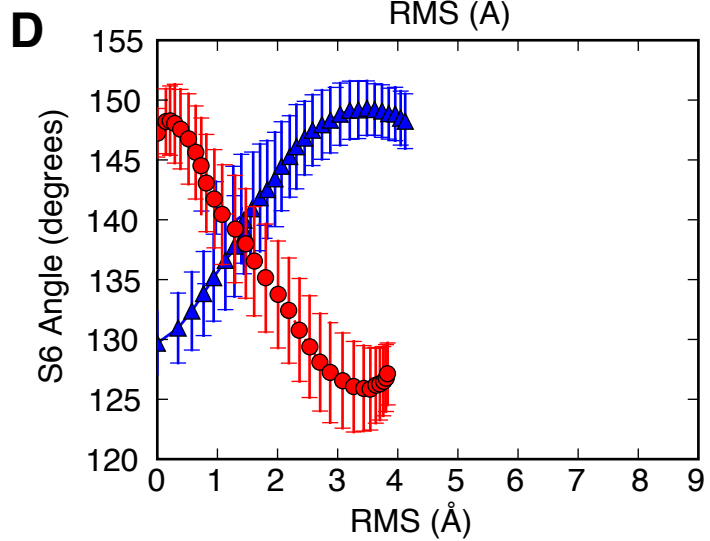

Supplement: NIHMS156019-supplement-Supp_Fig_s06.pdf [file NIHMS156019-supplement-Supp_Fig_s06.pdf]

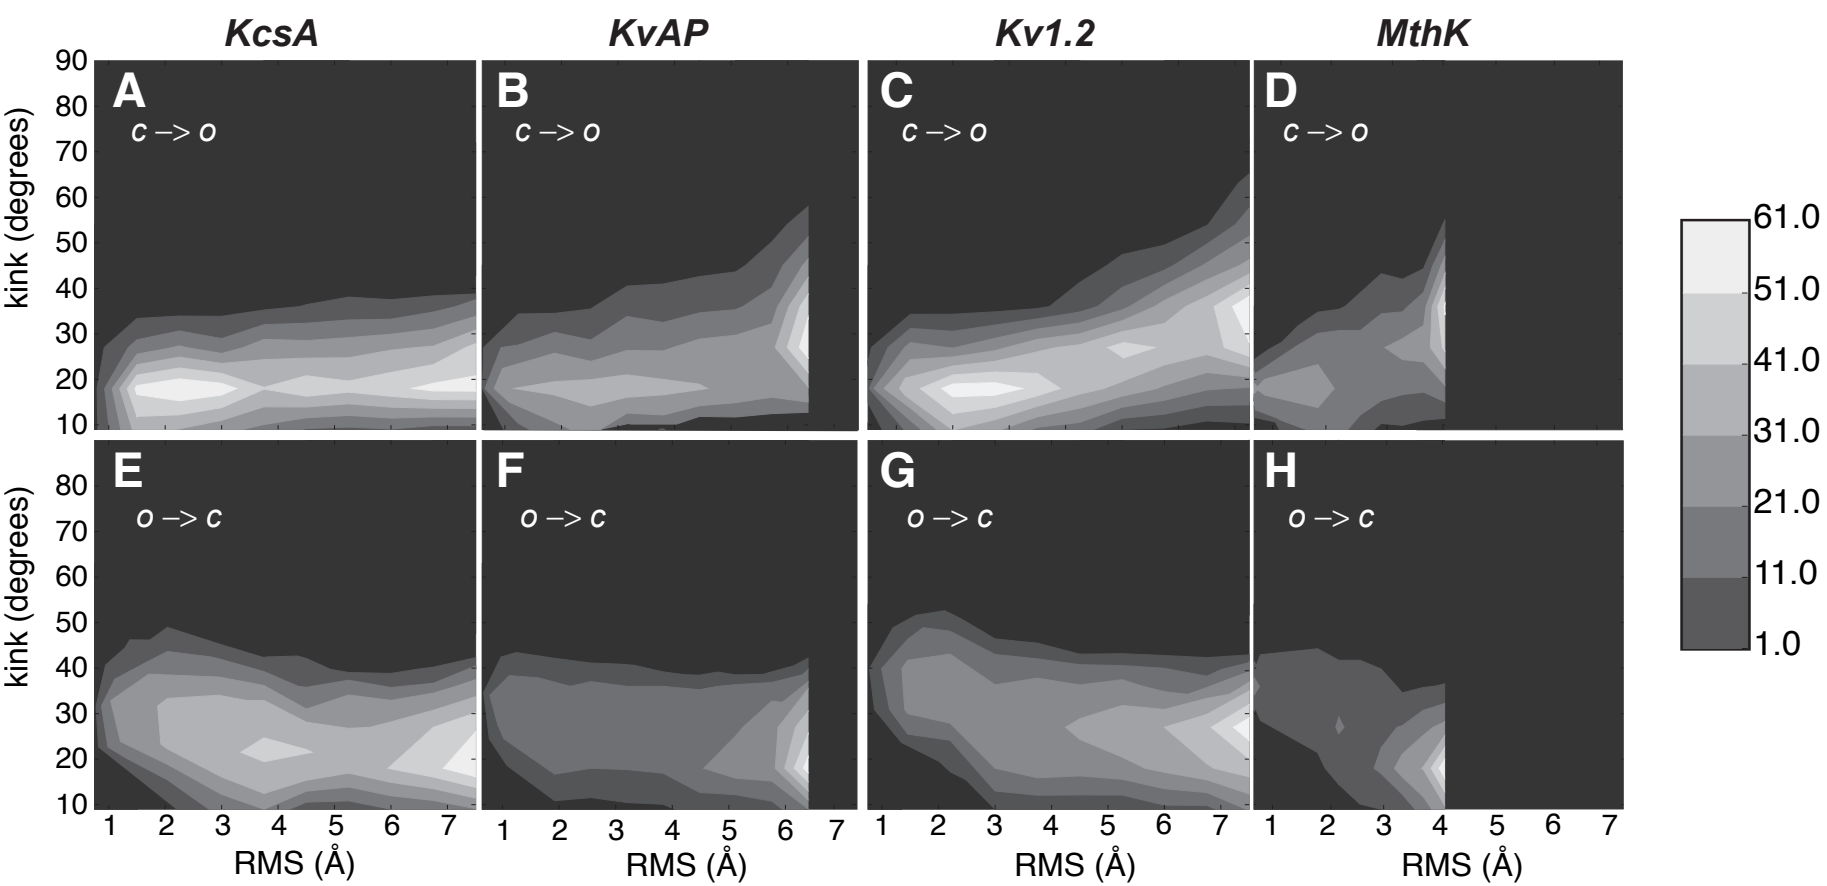

Supplement: NIHMS156019-supplement-Supp_Fig_s07.pdf [file NIHMS156019-supplement-Supp_Fig_s07.pdf]

**A**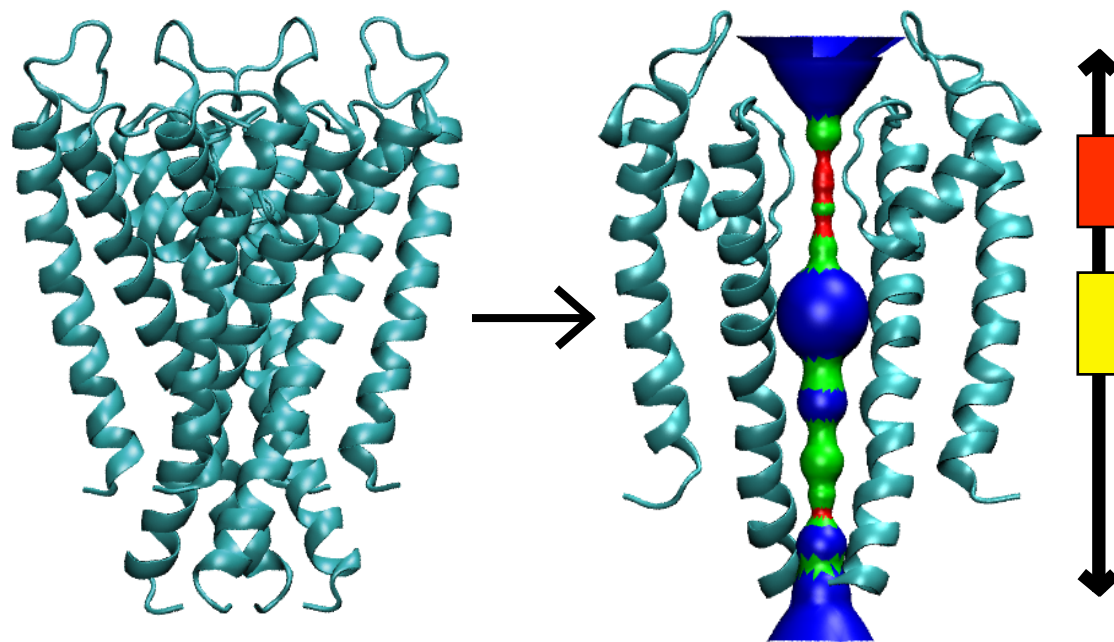

Selectivity Filter

Water Cavity

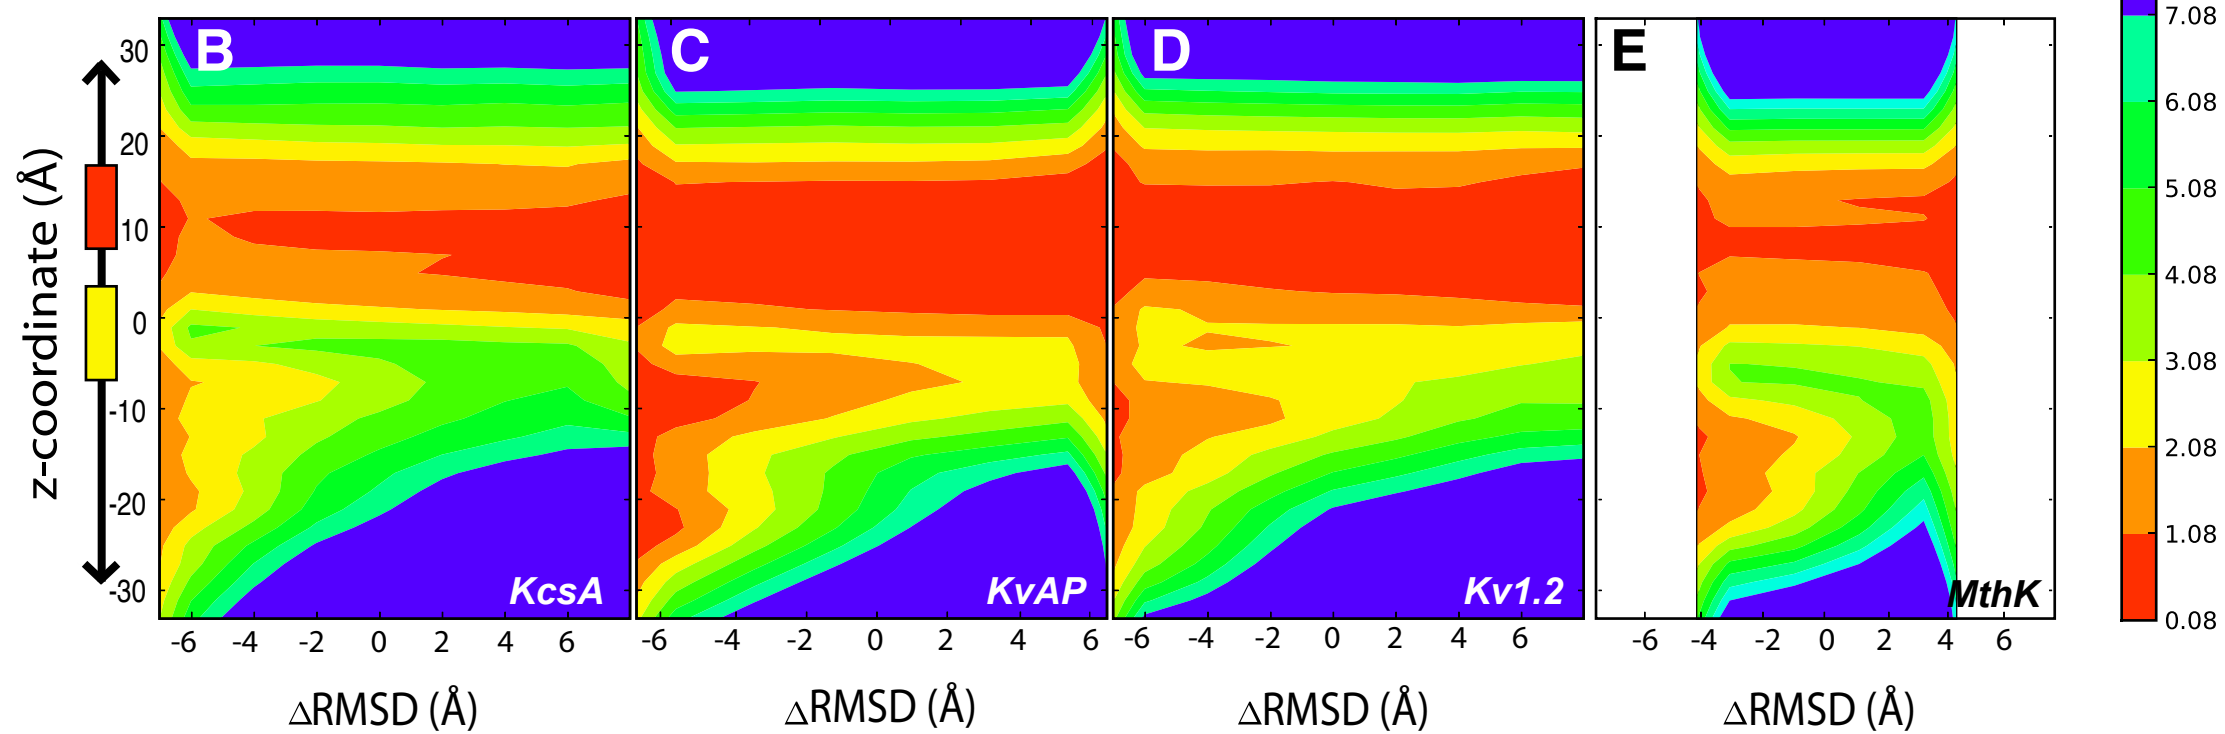

Supplement: NIHMS156019-supplement-Supp_Fig_s08.pdf [file NIHMS156019-supplement-Supp_Fig_s08.pdf]

**A**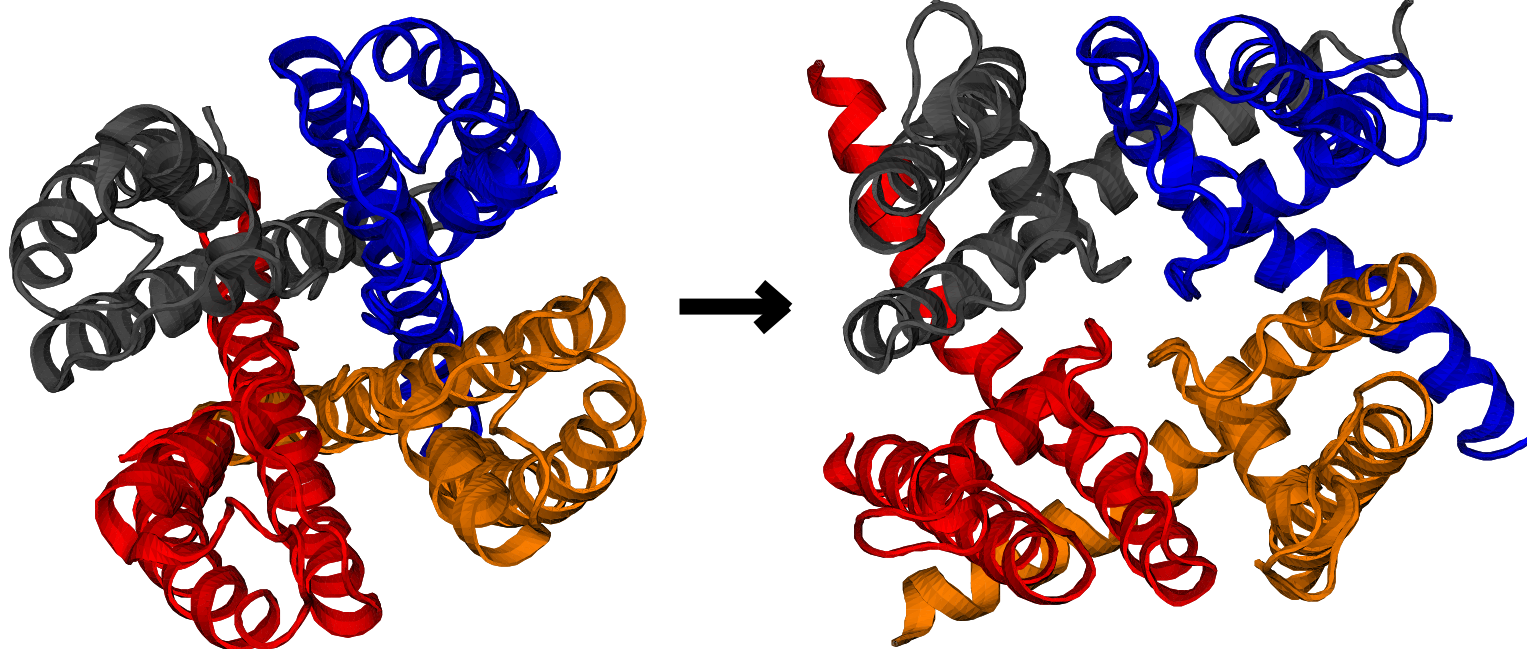**B**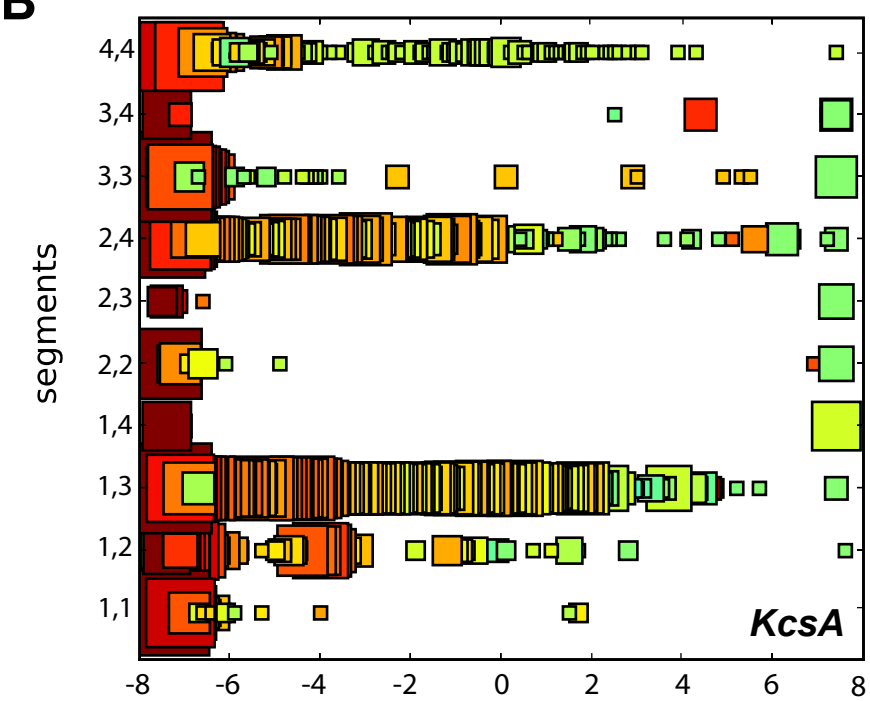**C**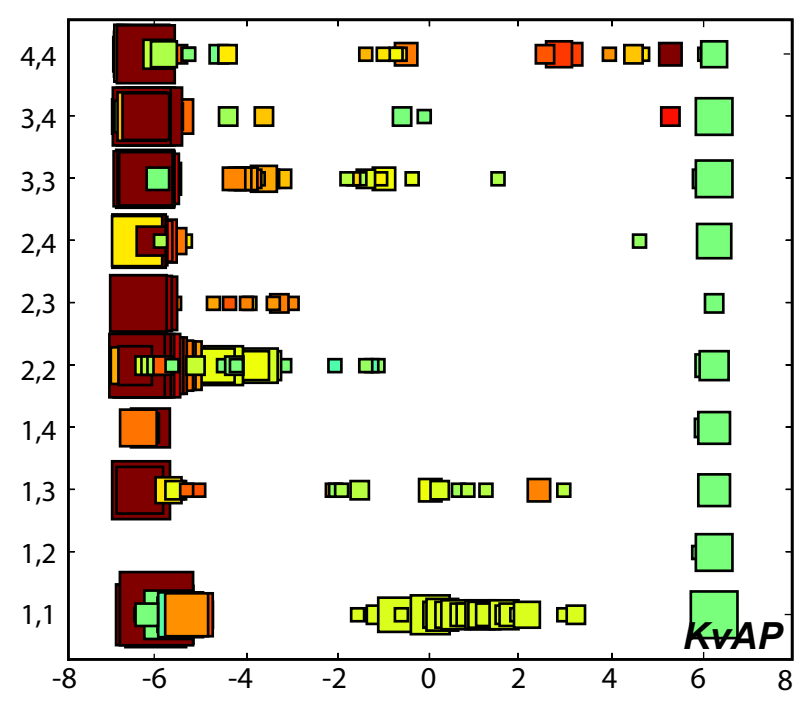**Percent Correlation**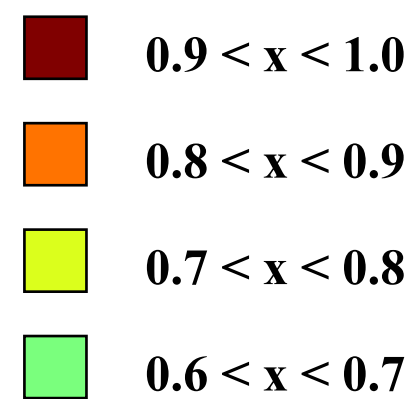**D**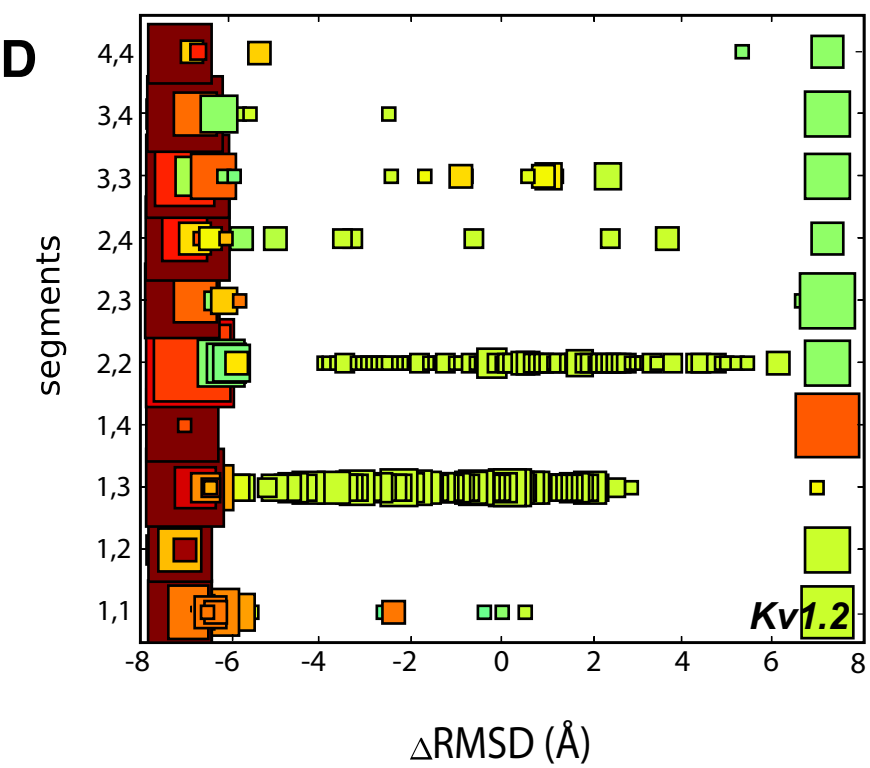**E**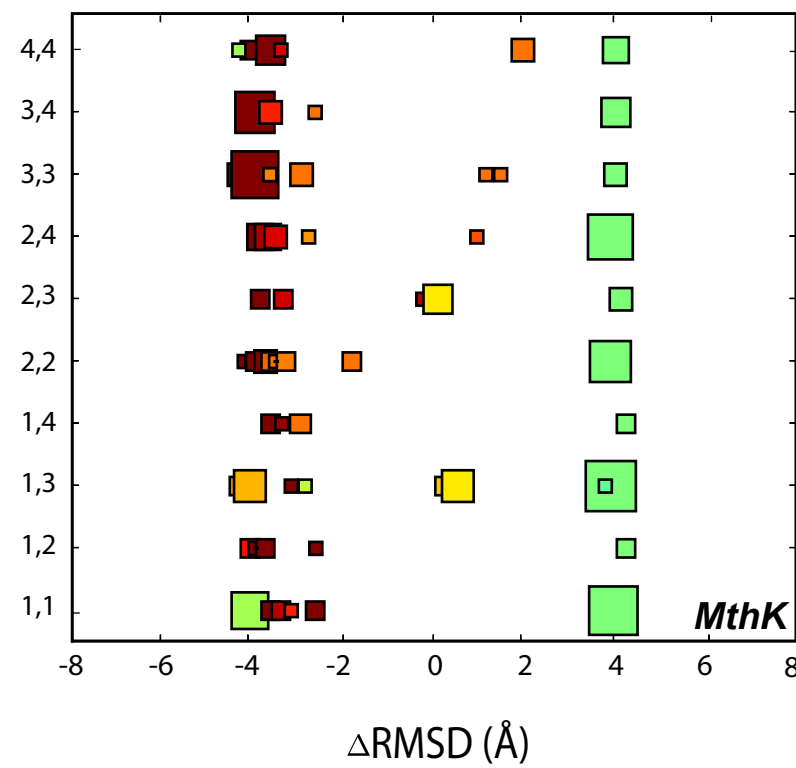**Population**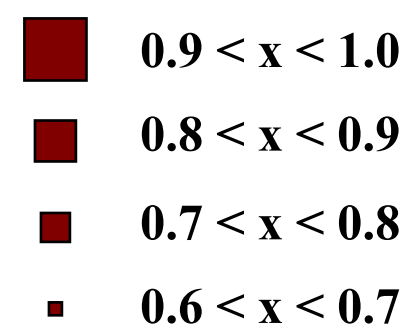

Supplement: NIHMS156019-supplement-Supp_Fig_s09.pdf [file NIHMS156019-supplement-Supp_Fig_s09.pdf]

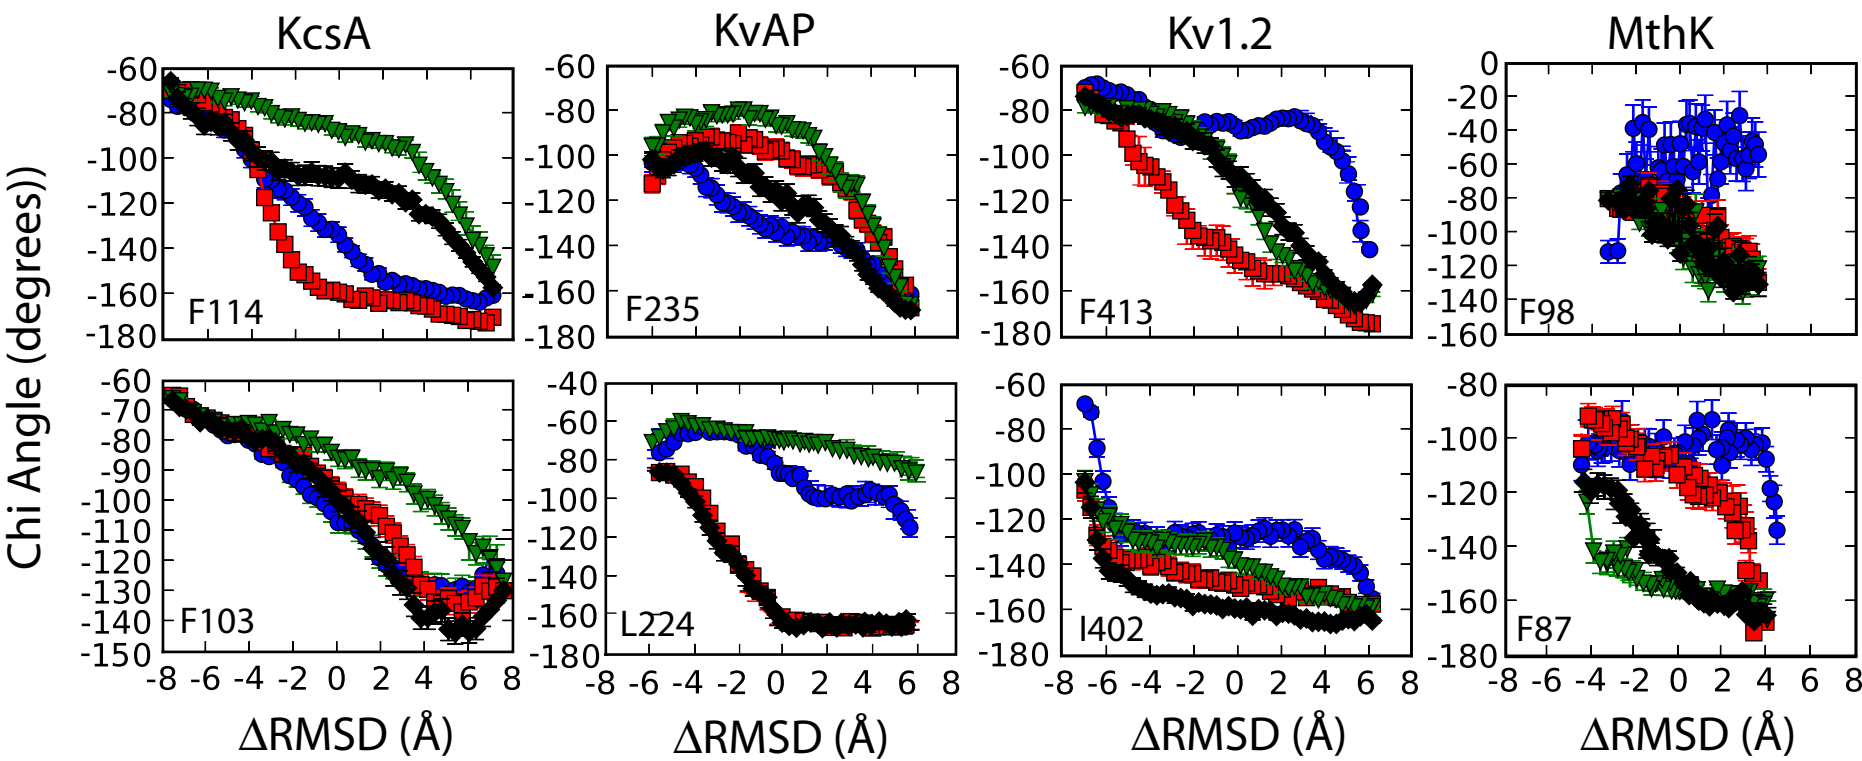

Supplement: NIHMS156019-supplement-Supp_Fig_s10.pdf [file NIHMS156019-supplement-Supp_Fig_s10.pdf]

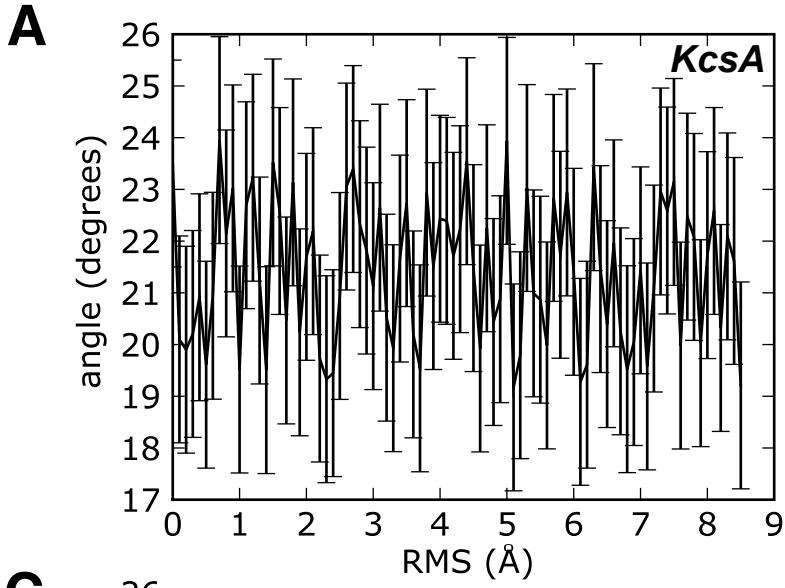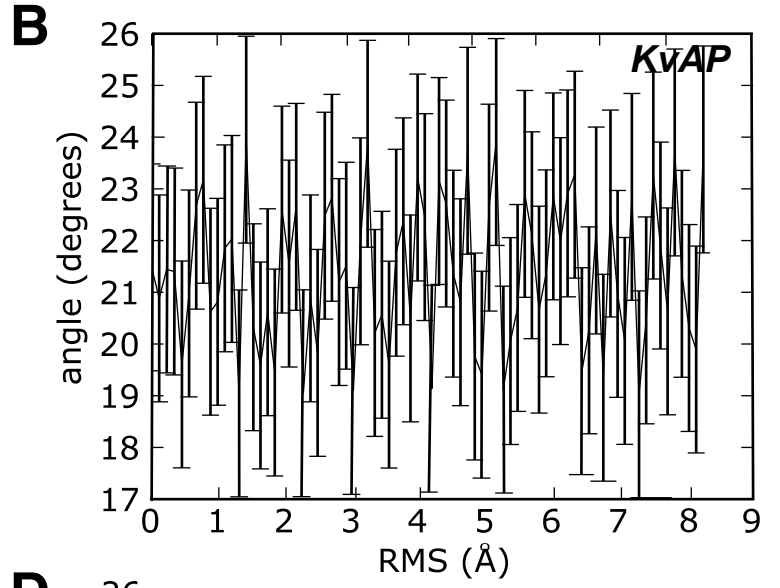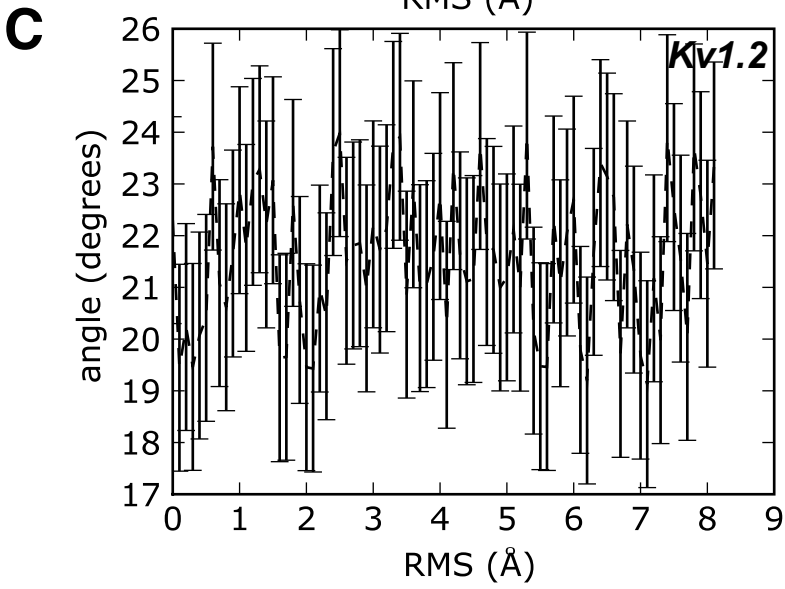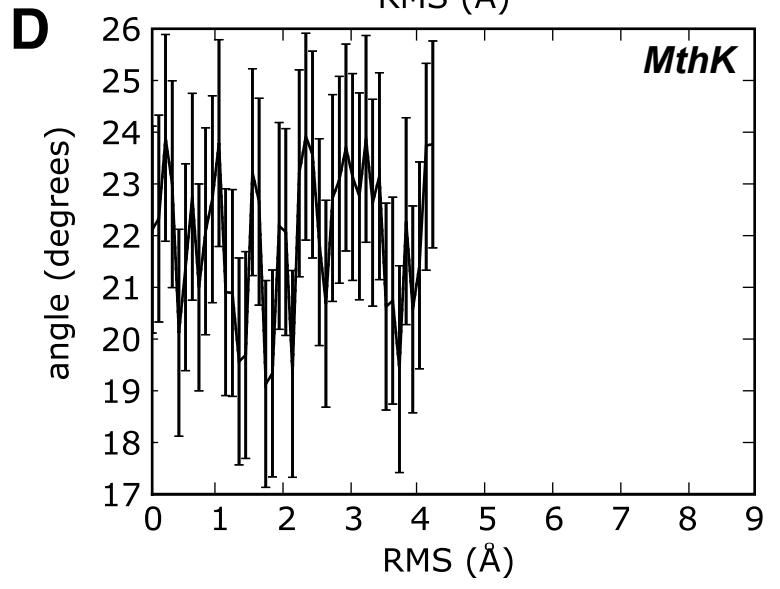

Supplement: NIHMS156019-supplement-Supp_Fig_s12.pdf [file NIHMS156019-supplement-Supp_Fig_s12.pdf]

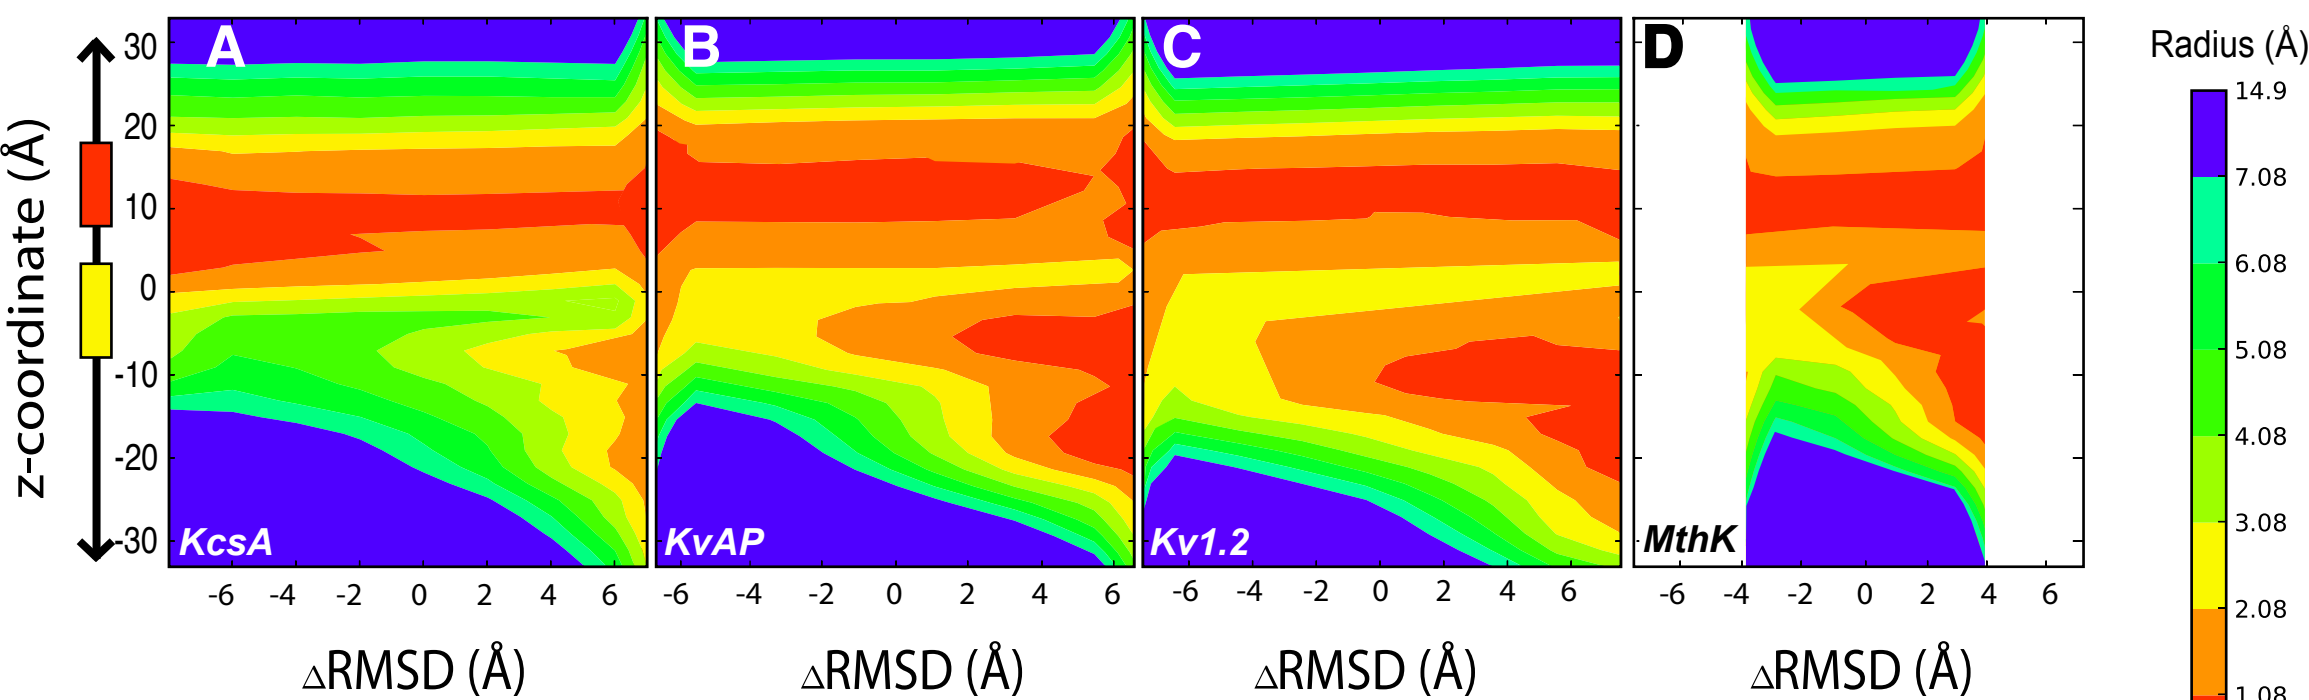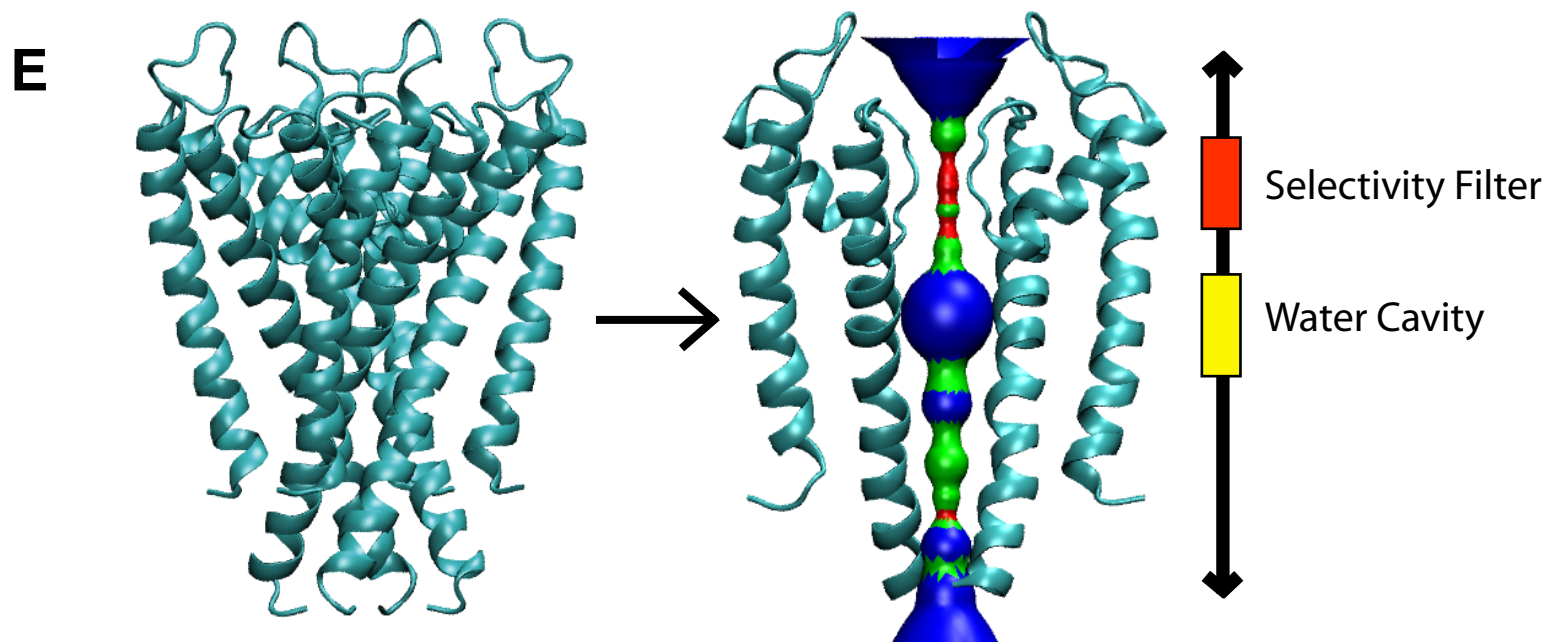

Supplement: NIHMS156019-supplement-Supp_Fig_s13.pdf [file NIHMS156019-supplement-Supp_Fig_s13.pdf]

Chi Angle (degrees))

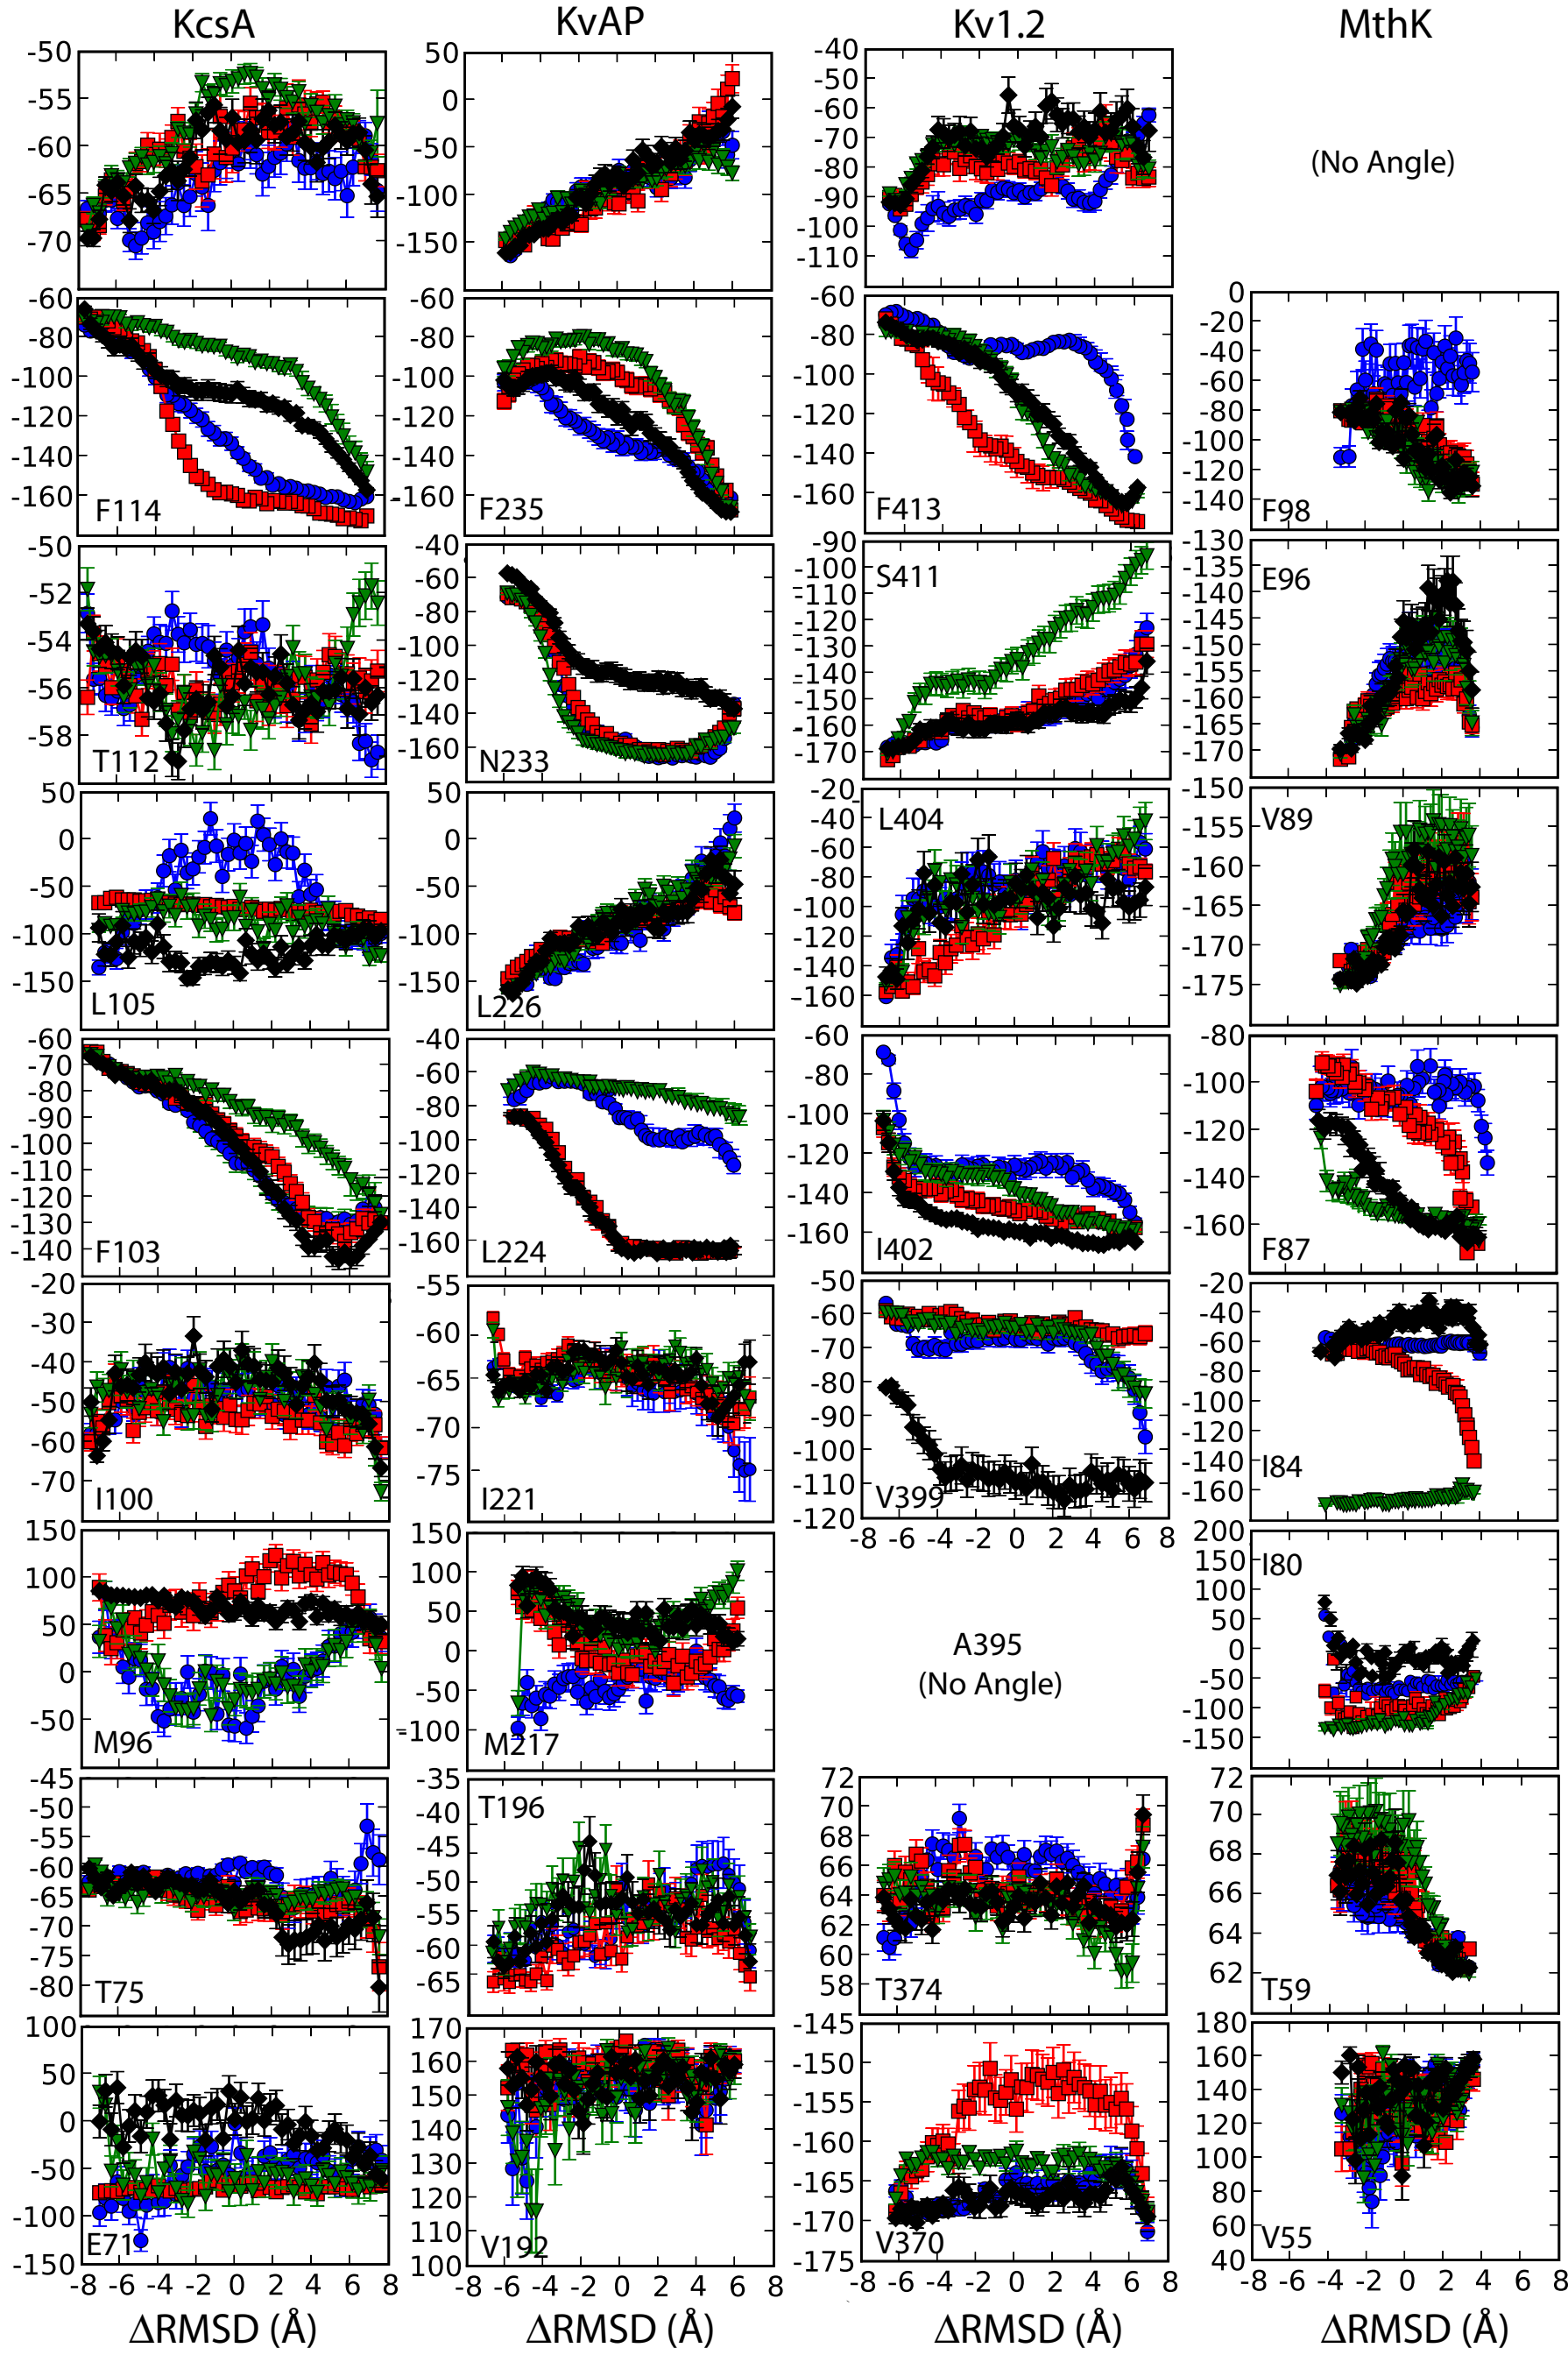

Supplement: NIHMS156019-supplement-Supp_Fig_s14.pdf [file NIHMS156019-supplement-Supp_Fig_s14.pdf]

**A**

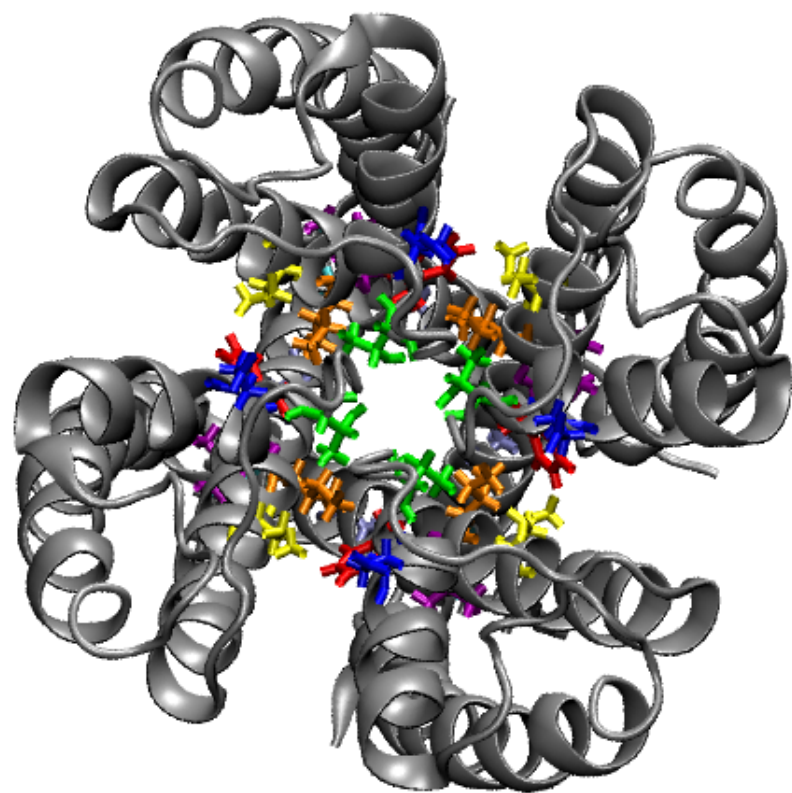

**B**

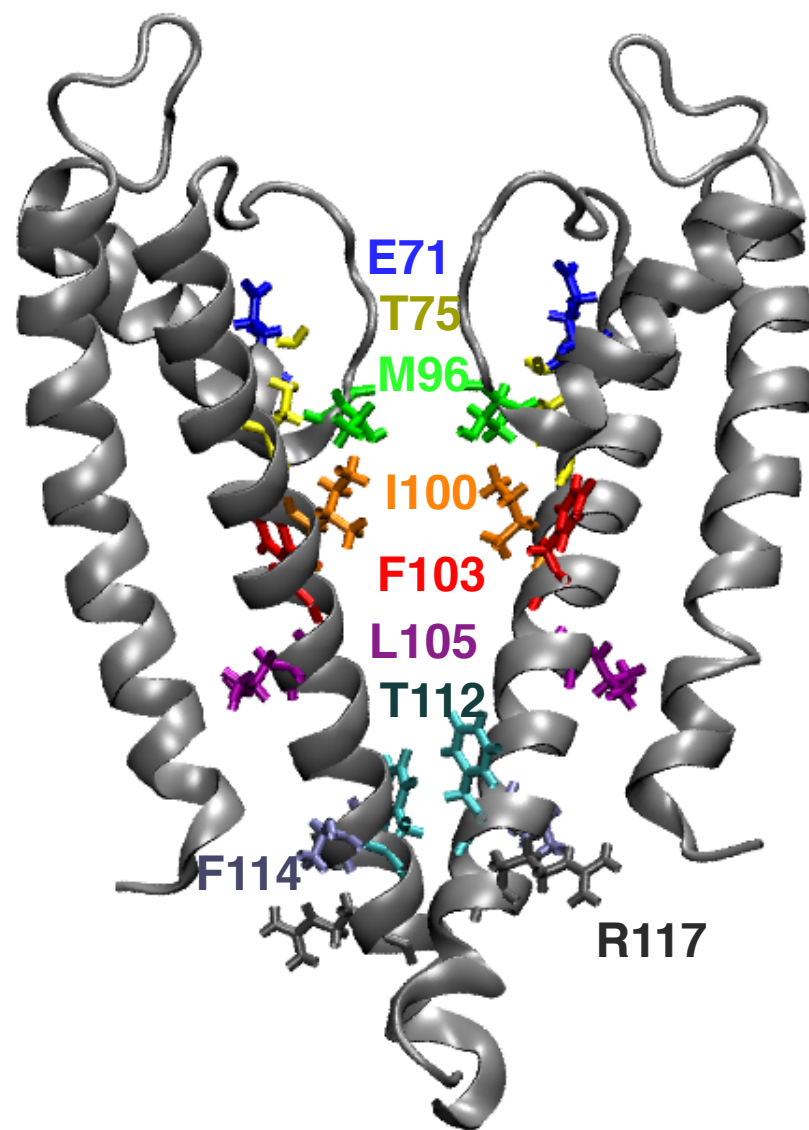

Supplement: NIHMS156019-supplement-Supp_Table_s1.pdf [file NIHMS156019-supplement-Supp_Table_s1.pdf]
